# Supplementary material for: Molecular structures of Pr@C72 and Pr@C72(C6H3Cl2): a combined experimental–theoretical investigation
Source: Royal Society of Chemistry journal article supplement (doi:10.1039/c5ra17608e), 2015-01-01
Supplement: c5ra17608e1.pdf [file c5ra17608e1.pdf]

Electronic Supplementary Material (ESI) for RSC Advances.

This journal is © The Royal Society of Chemistry 2015

### Supporting Information

#### **Molecular structures of Pr@C<sub>72</sub> and Pr@C<sub>72</sub>(C<sub>6</sub>H<sub>3</sub>Cl<sub>2</sub>): a combined experimental-theoretical investigation†**

Yan-li Zhao,<sup>a,b</sup> Qin Zhou,<sup>a</sup> Yong-fu Lian<sup>\*a</sup> and Hai-tao Yu<sup>\*a</sup>

<sup>a</sup> *Key Laboratory of Functional Inorganic Material Chemistry (Ministry of Education of China) and School of Chemistry and Materials Science, Heilongjiang University, Harbin 150080, PR China.*

<sup>b</sup> *School of Pharmacy, Jiamusi University, Jiamusi 154007, PR China*

*E-mail addresses: chyflian@hlju.edu.cn (Y.-f. Lian), yuhaitao@hlju.edu.cn (H.-t. Yu)*

## Contents

**Table S1** Spin densities and POAV values of all C atoms in  $\text{Pr}@C_2(10612)-C_{72}$ . Geometries were optimized at the B3LYP/6-31G(d)~MWB48.

**Table S2** Relative energies (kcal/mol) of the optimized twenty-four isomers of  $\text{Pr}@C_2(10612)-C_{72}(C_6H_3Cl_2)$  at the BLYP or B3LYP level (ECP and MWB48 for Pr atom and 3-21G or 6-31G(d) for the Cl, C, and H atoms).

**Table S3** Relative concentrations (RC, %) and relative Gibbs free energies ( $\Delta G$ , kcal/mol) for the optimized isomers of  $\text{Pr}@C_2(10612)-C_{72}(C_6H_3Cl_2)$  with different dichlorophenyl groups at C(70). The temperature is 298.15 K and 486.65 K (the boiling point of TCB) and the computations was performed at the B3LYP/6-31G(d)~MWB48 level of theory.

**Table S4** Orbitals, energies, and occupancied electron numbers of  $\text{Pr}@C_{72}(C_6H_3Cl_2)$  (**1c**, **1c'**) and  $\text{La}@C_{72}(C_6H_3Cl_2)$  (**C**, **C'**) using the B3LYP functional with the 6-31G(d) (for the Cl, C, and H atoms), MWB48 (for the Pr atom), and MWB46 (for the La atom) basis sets. The structure **C** is given in Figure 4 and **C** and **C'** are two conformational isomers due to different aryl ring orientations. Pink regions and green regions show positive and negative wave function, respectively.

**Table S5** Relative energies (kcal/mol) of optimized  $C_{72}$ ,  $C_{72}^-$ ,  $C_{72}^{2-}$ ,  $C_{72}^{3-}$  and  $\text{Pr}@C_{72}$  at different levels of computation.

**Table S6** Computed relative energies (RE, kcal/mol), molecular symmetries (MS)<sup>a</sup>, and Mulliken charges (Q) of the Pr atoms for the species with different spin multiplicities (m) using the B3LYP functional with the 6-31G(d) (for the Cl, C, and H atoms) and MWB48 (for the Pr atom) basis sets.

**Fig. S1** Optimized twenty-four structures of isomers of  $\text{Pr}@C_2(10612)-C_{72}(C_6H_3Cl_2)$  at the BLYP/3-21G~MWB48 level of theory.

**Fig. S2** Electron difference densities of  $C_2(10612)-C_{72}$  ((a) ~ (d)) and  $C_{2v}(11188)-C_{72}$  ((e) ~ (g)). (a)  $C_{71}-C_{72}-C_{59}$  plane, (b)  $C_{65}-C_{66}-C_{58}$  plane, (c)  $C_{70}-C_{56}-C_{55}$  plane, (d)  $C_{63}-C_{64}-C_{72}$  plane of  $C_2(10612)-C_{72}$ ; (e)  $C_{71}-C_{72}-C_{59}$  plane, (f)  $C_{65}-C_{66}-C_{33}$  plane, (g)  $C_{69}-C_{70}-C_{43}$  plane and (h)  $C_{63}-C_{64}-C_{54}$  plane of  $C_{2v}(11188)-C_{72}$ . Blue solid lines and brown

dotted lines show the areas in which the electron density is increased and decreased, respectively.

### **Geometries of stationary points**

Table S1 Spin densities and POAV values of all C atoms in Pr@C<sub>2</sub>(10612)-C<sub>72</sub>. Geometries were optimized at the B3LYP/6-31G(d)~MWB48

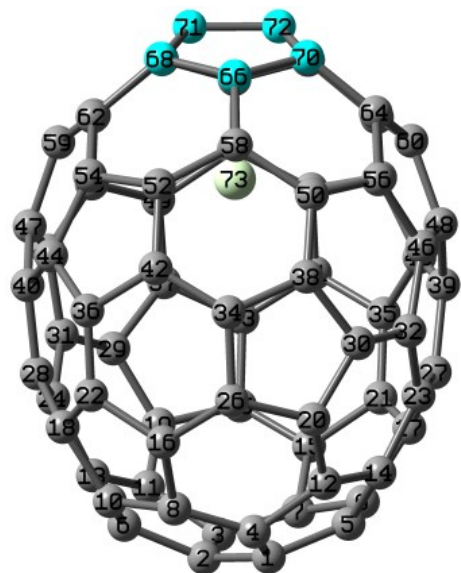

| No. | spin  | POA<br>V | No. | spin  | POA<br>V |
|-----|-------|----------|-----|-------|----------|
| 1   | 0.00  | 12.13    | 37  | 0.06  | 10.25    |
| 2   | 0.00  | 12.13    | 38  | 0.06  | 10.25    |
| 3   | 0.00  | 11.97    | 39  | 0.02  | 7.62     |
| 4   | 0.00  | 11.97    | 40  | 0.02  | 7.62     |
| 5   | 0.00  | 11.21    | 41  | 0.02  | 11.78    |
| 6   | 0.00  | 11.21    | 42  | 0.02  | 11.78    |
| 7   | 0.02  | 12.26    | 43  | -0.02 | 11.98    |
| 8   | 0.02  | 12.26    | 44  | -0.02 | 11.98    |
| 9   | 0.00  | 11.19    | 45  | 0.05  | 9.08     |
| 10  | 0.00  | 11.19    | 46  | 0.05  | 9.08     |
| 11  | 0.02  | 11.34    | 47  | 0.00  | 9.50     |
| 12  | 0.02  | 11.34    | 48  | 0.00  | 9.50     |
| 13  | 0.01  | 10.63    | 49  | -0.02 | 8.72     |
| 14  | 0.01  | 10.63    | 50  | -0.02 | 8.73     |
| 15  | -0.01 | 11.97    | 51  | -0.03 | 10.87    |
| 16  | -0.01 | 11.97    | 52  | -0.03 | 10.87    |
| 17  | 0.05  | 10.63    | 53  | 0.13  | 10.01    |
| 18  | 0.05  | 10.63    | 54  | 0.13  | 10.00    |
| 19  | 0.03  | 11.19    | 55  | 0.00  | 10.31    |
| 20  | 0.03  | 11.19    | 56  | 0.00  | 10.31    |
| 21  | 0.03  | 11.45    | 57  | 0.03  | 9.01     |
| 22  | 0.03  | 11.45    | 58  | 0.03  | 9.00     |
| 23  | 0.01  | 7.36     | 59  | 0.02  | 10.96    |
| 24  | 0.01  | 7.36     | 60  | 0.02  | 10.96    |
| 25  | 0.00  | 12.26    | 61  | -0.04 | 9.40     |
| 26  | 0.00  | 12.26    | 62  | -0.04 | 9.40     |
| 27  | -0.01 | 7.28     | 63  | 0.00  | 11.28    |
| 28  | -0.01 | 7.27     | 64  | 0.00  | 11.28    |
| 29  | 0.00  | 10.89    | 65  | -0.02 | 10.88    |
| 30  | 0.00  | 10.89    | 66  | -0.02 | 10.89    |
| 31  | -0.01 | 7.44     | 67  | 0.06  | 13.01    |
| 32  | -0.01 | 7.45     | 68  | 0.06  | 13.01    |
| 33  | 0.02  | 11.72    | 69  | 0.08  | 13.11    |
| 34  | 0.02  | 11.72    | 70  | 0.08  | 13.11    |
| 35  | 0.03  | 11.05    | 71  | -0.01 | 15.19    |
| 36  | 0.03  | 11.05    | 72  | -0.01 | 15.18    |

Table S2 Relative energies (kcal/mol) of the optimized twenty-four isomers of Pr@C<sub>2</sub>(10612)-C<sub>72</sub>(C<sub>6</sub>H<sub>3</sub>Cl<sub>2</sub>) at the BLYP or B3LYP level (ECP and MWB48 for Pr atom and 3-21G or 6-31G(d) for the Cl, C, and H atoms)

| Addition position | Isomer     | BLYP/3-21G~MWB48 | B3LYP/6-31G(d)~MWB48 |
|-------------------|------------|------------------|----------------------|
| C(70)             | <b>1a</b>  | 0.28             | 1.35                 |
|                   | <b>1a'</b> | 1.61             | 2.73                 |
|                   | <b>1b</b>  | 0                | 1.22                 |
|                   | <b>1b'</b> | 1.38             | 2.69                 |
|                   | <b>1c</b>  | 0.71             | 0.00                 |
|                   | <b>1c'</b> | 0.75             | 0.15                 |
| C(68)             | <b>2a</b>  | 3.85             |                      |
|                   | <b>2a'</b> | 5.26             |                      |
|                   | <b>2b</b>  | 3.62             |                      |
|                   | <b>2b'</b> | 6.65             |                      |
|                   | <b>2c</b>  | 4.65             |                      |
|                   | <b>2c'</b> | 4.66             |                      |
| C(71)             | <b>3a</b>  | 10.92            |                      |
|                   | <b>3a'</b> | 10.68            |                      |
|                   | <b>3b</b>  | 10.79            |                      |
|                   | <b>3b'</b> | 10.57            |                      |
|                   | <b>3c</b>  | 11.31            |                      |
|                   | <b>3c'</b> | 13.86            |                      |
| C(66)             | <b>4a</b>  | 18.90            |                      |
|                   | <b>4a'</b> | 16.76            |                      |
|                   | <b>4b</b>  | 18.75            |                      |
|                   | <b>4b'</b> | 16.67            |                      |
|                   | <b>4c</b>  | 16.20            |                      |
|                   | <b>4c'</b> | 16.59            |                      |

Table S3 Relative concentrations (RC, %) and relative Gibbs free energies ( $\Delta G$ , kcal/mol) for the optimized isomers of Pr@C<sub>2</sub>(10612)-C<sub>72</sub>(C<sub>6</sub>H<sub>3</sub>Cl<sub>2</sub>) with different dichlorophenyl groups at C(70). The temperature is 298.15 K and 486.65 K (the boiling point of TCB) and the computations was performed at the B3LYP/6-31G(d)~MWB48 level of theory

| Isomer     | 298.15 K   |        | 486.65 K   |        |
|------------|------------|--------|------------|--------|
|            | $\Delta G$ | RC (%) | $\Delta G$ | RC (%) |
| <b>1a</b>  | 2.10       | 1.59   | 2.73       | 3.19   |
| <b>1a'</b> | 3.43       | 0.17   | 4.01       | 0.84   |
| <b>1b</b>  | 2.11       | 1.57   | 2.79       | 2.99   |
| <b>1b'</b> | 3.44       | 0.17   | 4.05       | 0.81   |
| <b>1c</b>  | 0.18       | 41.15  | 0.35       | 37.88  |
| <b>1c'</b> | 0.00       | 55.35  | 0.00       | 54.29  |

Table S4 Orbitals, energies, and occupied electron numbers of Pr@C<sub>72</sub>(C<sub>6</sub>H<sub>3</sub>Cl<sub>2</sub>) (**1c**, **1c'**) and La@C<sub>72</sub>(C<sub>6</sub>H<sub>3</sub>Cl<sub>2</sub>) (**C**, **C'**) using the B3LYP functional with the 6-31G(d) (for the Cl, C, and H atoms), MWB48 (for the Pr atom), and MWB46 (for the La atom) basis sets. The structure **C** is given in Figure 4 and **C** and **C'** are two conformational isomers due to different aryl ring orientations. Pink regions and green regions show positive and negative wave function, respectively

| Pr@C <sub>2</sub> (10612)-C <sub>72</sub> ( <b>1c</b> )                                                              |                                                                                     |                                                                                                                    |                                                                                       | La@C <sub>2</sub> (10612)-C <sub>72</sub> ( <b>C</b> )                                                                 |                                                                                       |                                                                                                                      |                                                                                       |
|----------------------------------------------------------------------------------------------------------------------|-------------------------------------------------------------------------------------|--------------------------------------------------------------------------------------------------------------------|---------------------------------------------------------------------------------------|------------------------------------------------------------------------------------------------------------------------|---------------------------------------------------------------------------------------|----------------------------------------------------------------------------------------------------------------------|---------------------------------------------------------------------------------------|
| No. 261<br>-2.89 eV<br>             |    | No. 258<br>(HOMO)<br>-5.28 eV<br> |    | No. 261<br>-2.91 eV<br>             |    | No. 258<br>(HOMO)<br>-5.28 eV<br> |    |
| No. 260<br>-3.08 eV<br>             |   | No. 257<br>-5.69 eV<br>           |   | No. 260<br>-3.08 eV<br>             |   | No. 257<br>-5.68 eV<br>           |   |
| No. 259<br>(LUMO)<br>-3.39 eV<br> |  | No. 256<br>-5.85 eV<br>         |  | No. 259<br>(LUMO)<br>-3.39 eV<br> |  | No. 256<br>-5.85 eV<br>         |  |

Table S4 (Continued)

| Pr@C <sub>2</sub> (10612)-C <sub>72</sub> ( <b>1c'</b> )                                                             |                                                                                    |                                                                                                                    |                                                                                     | La@C <sub>2</sub> (10612)-C <sub>72</sub> ( <b>C'</b> )                                                                |                                                                                      |                                                                                                                      |                                                                                      |
|----------------------------------------------------------------------------------------------------------------------|------------------------------------------------------------------------------------|--------------------------------------------------------------------------------------------------------------------|-------------------------------------------------------------------------------------|------------------------------------------------------------------------------------------------------------------------|--------------------------------------------------------------------------------------|----------------------------------------------------------------------------------------------------------------------|--------------------------------------------------------------------------------------|
| No. 261<br>-2.89 eV<br>             |   | No. 258<br>(HOMO)<br>-5.27 eV<br> |   | No. 261<br>-2.90 eV<br>             |   | No. 258<br>(HOMO)<br>-5.27 eV<br> |   |
| No. 260<br>-3.07 eV<br>             |   | No. 257<br>-5.69 eV<br>           |   | No. 260<br>-3.07 eV<br>             |   | No. 257<br>-5.67 eV<br>           |   |
| No. 259<br>(LUMO)<br>-3.38 eV<br> |  | No. 256<br>-5.85 eV<br>         |  | No. 259<br>(LUMO)<br>-3.38 eV<br> |  | No. 256<br>-5.85 eV<br>         |  |



Table S5 Relative energies (kcal/mol) of optimized  $C_{72}$ ,  $C_{72}^-$ ,  $C_{72}^{2-}$ ,  $C_{72}^{3-}$  and  $Pr@C_{72}$  at different levels of computation

| Isomer <sup>a</sup> | $C_{72}$           | $C_{72}^-$         | $C_{72}^{2-}$      | $C_{72}^{3-}$      | $Pr@C_{72}$                           | $Pr@C_{72}$                               |
|---------------------|--------------------|--------------------|--------------------|--------------------|---------------------------------------|-------------------------------------------|
|                     | B3LYP~<br>6-31G(d) | B3LYP~<br>6-31G(d) | B3LYP~<br>6-31G(d) | B3LYP~<br>6-31G(d) | BLYP~3-<br>21G<br>-MWB48 <sup>b</sup> | B3LYP~6-<br>31G(d)<br>-MWB48 <sup>b</sup> |
| 11188               | 0.00               | 0.00               | 0.00               | 0.00               | 1.62                                  | 0.62                                      |
| 10528               | 32.54              | 22.06              | 9.29               | 0.14               | 10.07                                 | 9.03                                      |
| 10612               | 18.30              | 11.08              | 2.72               | 5.62               | 0.00                                  | 0.00                                      |
| 10611               | 43.70              | 34.97              | 23.83              | 8.23               | 19.57                                 |                                           |
| 10538               | 25.44              | 20.34              | 14.10              | 10.34              | 17.14                                 |                                           |
| 10616               | 47.61              | 39.76              | 29.11              | 10.74              | 19.57                                 |                                           |
| 10610               | 39.68              | 31.31              | 23.07              | 10.81              | 15.28                                 |                                           |
| 10530               | 38.30              | 25.91              | 11.52              | 11.61              | 13.86                                 |                                           |
| 10784               | 27.43              | 18.79              | 9.93               | 11.95              | 20.47                                 |                                           |
| 10693               | 34.20              | 24.61              | 14.58              | 12.52              | 23.66                                 |                                           |
| 10689               | 31.31              | 23.45              | 15.01              | 13.88              | 18.11                                 |                                           |
| 10615               | 36.55              | 28.43              | 18.70              | 14.81              | 20.78                                 |                                           |
| 10554               | 34.06              | 28.21              | 19.04              | 15.03              | 27.86                                 |                                           |
| 11190               | 11.29              | 22.58              | 29.60              | 36.56              | 32.01                                 |                                           |

<sup>a</sup>The serial numbers of isomers are taken from the Ref [34].

<sup>b</sup>The 6-31G(d) and 3-21G basis sets are employed for the C atom and the MWB48 basis set for the Pr atom.

Table S6 Computed relative energies (RE, kcal/mol), molecular symmetries (MS)<sup>a</sup>, and Mulliken charges (Q) of the Pr atoms for the species with different spin multiplicities (m) using the B3LYP functional with the 6-31G(d) (for the Cl, C, and H atoms) and MWB48 (for the Pr atom) basis sets

| Species                                                                                    | m | RE    | MS              | Q   |
|--------------------------------------------------------------------------------------------|---|-------|-----------------|-----|
| Pr@C <sub>2</sub> (10612)-C <sub>72</sub> (C <sub>6</sub> H <sub>3</sub> Cl <sub>2</sub> ) | 1 | 0     | C <sub>1</sub>  | 0.9 |
|                                                                                            | 3 | 23.88 | C <sub>1</sub>  | 0.9 |
| Pr@C <sub>2</sub> (10612)-C <sub>72</sub>                                                  | 2 | 0     | C <sub>2</sub>  | 0.9 |
|                                                                                            | 4 | 33.42 | C <sub>2</sub>  | 0.9 |
| Pr@C <sub>2v</sub> (11188)-C <sub>72</sub>                                                 | 2 | 0     | C <sub>2v</sub> | 1.0 |
|                                                                                            | 4 | 20.78 | C <sub>2v</sub> | 1.0 |

<sup>a</sup> The tolerances in symmetry assignment is 0.01.

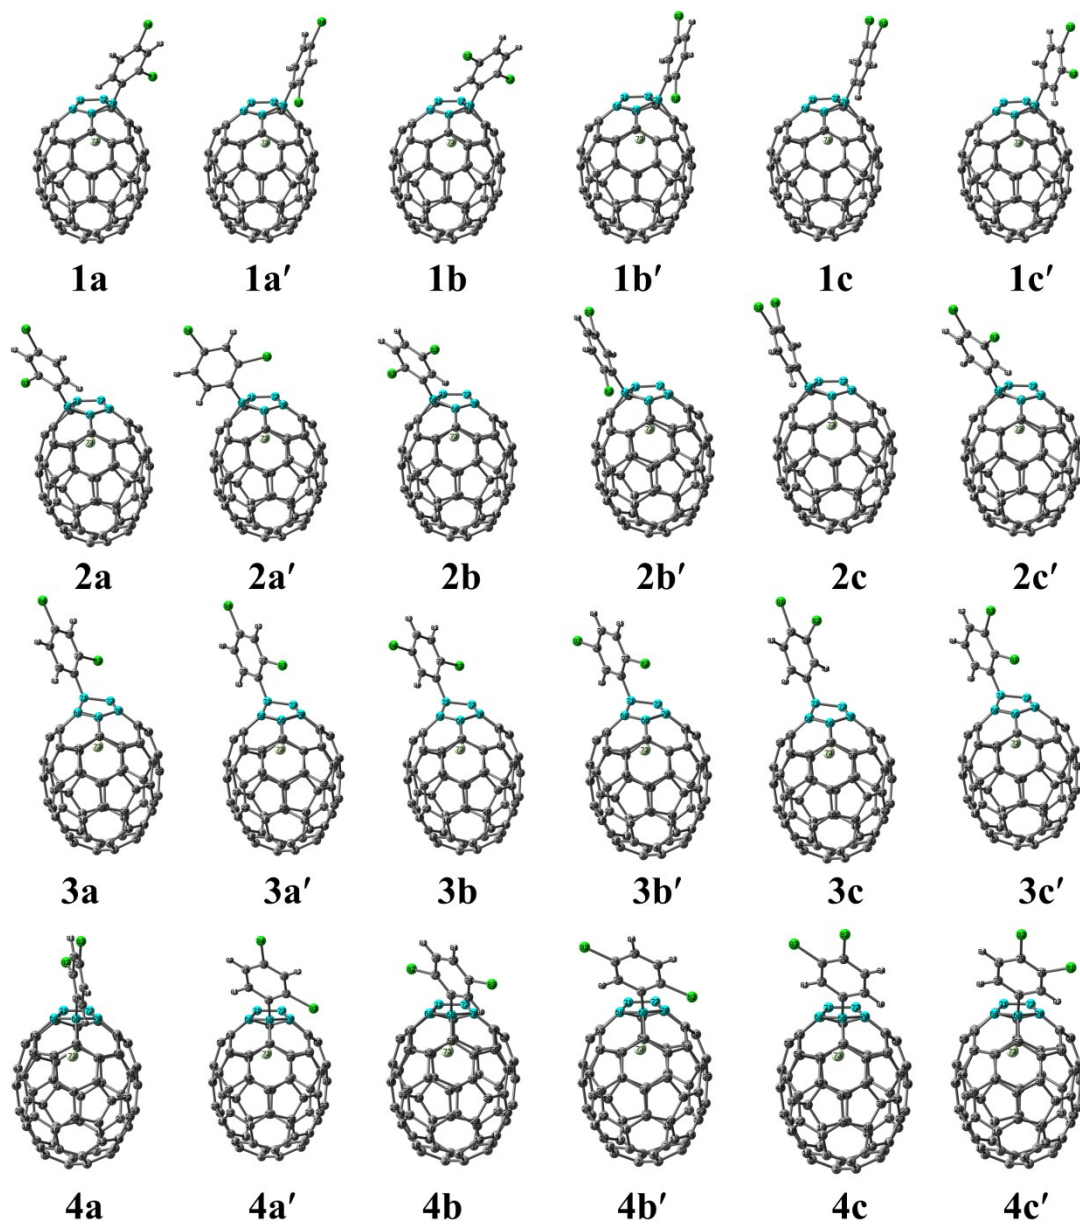

Fig. S1 Optimized twenty-four structures of isomers of  $\text{Pr}@C_2(10612)\text{-C}_{72}(\text{C}_6\text{H}_3\text{Cl}_2)$  at the BLYP/3-21G~MWB48 level of theory.

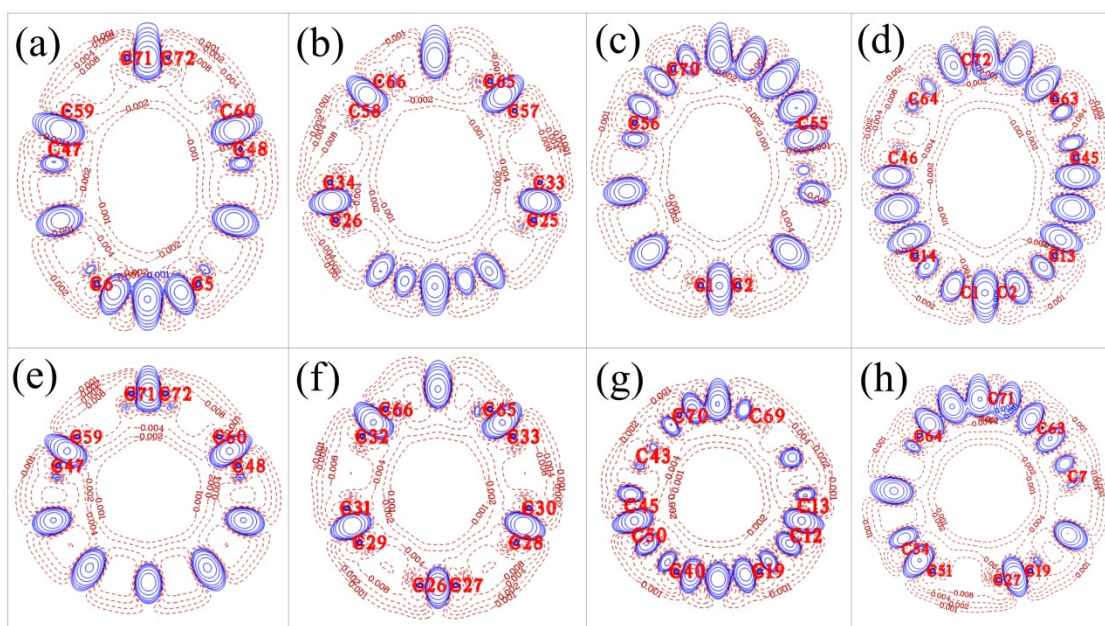

Fig. S2 Electron difference densities of  $C_2(10612)-C_{72}$  ((a) ~ (d)) and  $C_{2v}(11188)-C_{72}$  ((e) ~ (g)). (a)  $C_{71}-C_{72}-C_{59}$  plane, (b)  $C_{65}-C_{66}-C_{58}$  plane, (c)  $C_{70}-C_{56}-C_{55}$  plane, (d)  $C_{63}-C_{64}-C_{72}$  plane of  $C_2(10612)-C_{72}$ ; (e)  $C_{71}-C_{72}-C_{59}$  plane, (f)  $C_{65}-C_{66}-C_{33}$  plane, (g)  $C_{69}-C_{70}-C_{43}$  plane and (h)  $C_{63}-C_{64}-C_{54}$  plane of  $C_{2v}(11188)-C_{72}$ . Blue solid lines and brown dotted lines show the areas in which the electron density is increased and decreased, respectively.

## Geometries of stationary points

### 1. Pr@C<sub>2</sub>(10612)-C<sub>72</sub> (B3LYP/6-31G(d)~MWB48)

|   |             |             |             |
|---|-------------|-------------|-------------|
| C | 4.39565400  | -0.33626600 | 0.61054100  |
| C | 4.39553300  | 0.33628200  | -0.61120100 |
| C | 3.99979900  | 1.72703700  | -0.68062200 |
| C | 3.99994800  | -1.72702100 | 0.68003900  |
| C | 3.85955200  | 0.33129800  | 1.78346300  |
| C | 3.85920800  | -0.33128200 | -1.78401700 |
| C | 3.62617600  | 2.40859000  | 0.48170000  |
| C | 3.62610600  | -2.40857900 | -0.48221900 |
| C | 3.48964700  | 1.66312900  | 1.72137400  |
| C | 3.48932400  | -1.66311500 | -1.72185400 |
| C | 3.22437300  | 1.90776000  | -1.89254900 |
| C | 3.22476000  | -1.90775000 | 1.89211100  |
| C | 3.04639200  | 0.61374000  | -2.51482300 |
| C | 3.04688400  | -0.61372200 | 2.51442600  |
| C | 2.56178800  | 3.38589700  | 0.44444300  |
| C | 2.56172400  | -3.38588100 | -0.44475400 |
| C | 2.29247300  | 2.11184800  | 2.39653900  |
| C | 2.29200700  | -2.11184000 | -2.39678200 |
| C | 2.20396600  | 2.85386000  | -1.92730000 |
| C | 2.20436000  | -2.85384200 | 1.92705800  |
| C | 1.79248900  | 3.25251000  | 1.66374700  |
| C | 1.79218100  | -3.25249900 | -1.66391500 |
| C | 1.80105500  | -0.22997300 | 3.08025300  |
| C | 1.80044500  | 0.22998400  | -3.08038500 |
| C | 1.89912400  | 3.65709800  | -0.76000800 |
| C | 1.89929100  | -3.65707700 | 0.75981900  |
| C | 1.41104000  | 1.18978000  | 3.02936400  |
| C | 1.41044500  | -1.18976700 | -3.02942600 |
| C | 0.97541200  | 2.54943500  | -2.60462500 |
| C | 0.97593500  | -2.54942300 | 2.60462400  |
| C | 0.76327500  | 1.26369700  | -3.16780500 |
| C | 0.76389500  | -1.26369400 | 3.16789400  |
| C | 0.47704900  | 3.90834600  | -0.76963300 |
| C | 0.47721700  | -3.90833400 | 0.76972800  |
| C | 0.42959000  | 3.53637000  | 1.65735700  |
| C | 0.42927700  | -3.53637700 | -1.65725700 |
| C | -0.09766000 | 3.26157100  | -1.91995500 |
| C | -0.09725000 | -3.26154500 | 1.92015200  |
| C | -0.00869400 | 1.55615500  | 3.09483400  |
| C | -0.00928700 | -1.55615400 | -3.09459000 |

|    |             |             |             |
|----|-------------|-------------|-------------|
| C  | -0.24017900 | 3.92428700  | 0.43506700  |
| C  | -0.24025400 | -3.92429600 | -0.43484000 |
| C  | -0.47058300 | 2.73612600  | 2.43471000  |
| C  | -0.47104200 | -2.73612100 | -2.43441600 |
| C  | -0.59564700 | 0.85608600  | -3.29226600 |
| C  | -0.59498800 | -0.85611100 | 3.29271700  |
| C  | -0.97511000 | -0.52278500 | -3.29033500 |
| C  | -0.97444700 | 0.52278800  | 3.29081000  |
| C  | -1.42801000 | 2.77013000  | -1.89997600 |
| C  | -1.42761000 | -2.77007800 | 1.90045100  |
| C  | -1.58600000 | 3.43139600  | 0.48684400  |
| C  | -1.58607000 | -3.43139000 | -0.48634500 |
| C  | -1.76166000 | 2.77250700  | 1.78037200  |
| C  | -1.76202100 | -2.77249200 | -1.77982900 |
| C  | -1.68214400 | 1.62989100  | -2.74541000 |
| C  | -1.68155700 | -1.62990100 | 2.74597000  |
| C  | -2.23780600 | 2.93307100  | -0.67905200 |
| C  | -2.23762500 | -2.93300600 | 0.67966400  |
| C  | -2.32647400 | -0.62091000 | -2.78669300 |
| C  | -2.32582900 | 0.62088900  | 2.78726200  |
| C  | -2.72425800 | 1.74558400  | 1.96388100  |
| C  | -2.72477000 | -1.74568300 | -1.96325800 |
| C  | -2.77370700 | 0.73361400  | -2.50203700 |
| C  | -2.77308100 | -0.73359100 | 2.50265900  |
| C  | -3.35760400 | 2.03049200  | -0.46134700 |
| C  | -3.35745800 | -2.03047700 | 0.46212800  |
| C  | -3.65597700 | 1.50287700  | 0.87975800  |
| C  | -3.65628600 | -1.50295900 | -0.87893900 |
| C  | -3.67517100 | 0.98331500  | -1.42546900 |
| C  | -3.67466000 | -0.98324600 | 1.42625800  |
| C  | -4.18436900 | -0.16126100 | -0.70161700 |
| C  | -4.18410700 | 0.16125700  | 0.70254700  |
| Pr | -1.72250800 | -0.00002500 | -0.00051000 |

2. Pr@C<sub>2v</sub>(11188)-C<sub>72</sub> (B3LYP/6-31G(d)~MWB48)

|   |             |             |             |
|---|-------------|-------------|-------------|
| C | -3.87514400 | 1.44692300  | 0.71609400  |
| C | -3.87579000 | 1.43852900  | -0.72416300 |
| C | -3.84864100 | 0.06909000  | 1.16445100  |
| C | -3.85015200 | 0.05535400  | -1.15679900 |
| C | -3.12312700 | 2.39484800  | -1.43448100 |
| C | -3.12171800 | 2.41181000  | 1.41450100  |
| C | -3.15005500 | -0.27060600 | 2.32290100  |
| C | -3.15327700 | -0.29775700 | -2.31253800 |
| C | -2.32064800 | 3.36075300  | -0.71003300 |
| C | -2.32004700 | 3.36877100  | 0.67793200  |
| C | -2.37376500 | 2.01642800  | -2.60055400 |
| C | -2.37066000 | 2.04652200  | 2.58366300  |
| C | -2.39753700 | 0.72948600  | 3.05024200  |
| C | -2.40155300 | 0.69379900  | -3.05209700 |
| C | -2.44803200 | -1.54433400 | -2.37807500 |
| C | -2.44487000 | -1.51638000 | 2.40244100  |
| C | -2.42395000 | -2.44569400 | -1.27080200 |
| C | -1.08153600 | 3.57480100  | -1.43561400 |
| C | -1.07953900 | 3.59076900  | 1.39931500  |
| C | -1.11258900 | 2.72964000  | -2.59643100 |
| C | -1.10901100 | 2.75961300  | 2.56978500  |
| C | -1.21882000 | 0.06749200  | -3.57326800 |
| C | -1.21415100 | 0.10893300  | 3.57787400  |
| C | -1.26545800 | -1.29016300 | 3.23040800  |
| C | -1.26956400 | -1.32788400 | -3.20997700 |
| C | 0.13717600  | 3.84863500  | -0.75687500 |
| C | 0.13816000  | 3.85722300  | 0.71585100  |
| C | 0.07968900  | 2.18229400  | 3.10565800  |
| C | 0.07554100  | 2.14644000  | -3.12734300 |
| C | 0.03104800  | 0.80703800  | 3.63083000  |
| C | 0.02618600  | 0.76512900  | -3.63608200 |
| C | -0.07424000 | -2.07156100 | -3.00830600 |
| C | -0.06996100 | -2.03497800 | 3.03450400  |
| C | 1.17046700  | -1.41459300 | -3.21072900 |
| C | 1.17535300  | -1.37696900 | 3.22959900  |
| C | 1.21857500  | -0.01917000 | -3.57415000 |
| C | 1.22359100  | 0.02227300  | 3.57692800  |
| C | 1.30262500  | 2.64412300  | -2.59790000 |
| C | 1.30596700  | 2.67420200  | 2.56920000  |
| C | 1.33277800  | 3.48938300  | -1.43702500 |
| C | 1.33449200  | 3.50536500  | 1.39857700  |
| C | 2.24510600  | -2.59360300 | 1.30270800  |

|    |             |             |             |
|----|-------------|-------------|-------------|
| C  | 2.33164600  | -1.71387400 | -2.38023600 |
| C  | 2.33544000  | -1.68627700 | 2.40116100  |
| C  | 2.44316600  | 0.52194600  | -3.05409100 |
| C  | 2.44744100  | 0.55766600  | 3.04816900  |
| C  | -3.79361800 | -0.80095600 | 0.00847300  |
| C  | 3.72835600  | -1.06704700 | 0.00530500  |
| C  | 2.51371800  | 1.87327900  | 2.58168400  |
| C  | 2.50989200  | 1.84316600  | -2.60284600 |
| C  | 2.55431900  | 3.18852200  | -0.71230600 |
| C  | 2.55556900  | 3.19655300  | 0.67588200  |
| C  | 3.12381100  | -0.52051500 | -2.31565500 |
| C  | 3.28546600  | 2.16765300  | -1.43731100 |
| C  | 3.84429200  | -0.21737800 | -1.16024100 |
| C  | 3.84606900  | -0.20360800 | 1.16134900  |
| C  | 3.96974400  | 1.16873400  | 0.71272000  |
| C  | 3.96847100  | 1.16034900  | -0.72762500 |
| C  | -3.04078700 | -2.02007000 | 0.01502000  |
| C  | 2.88967600  | -2.22852400 | 0.01267000  |
| C  | 3.12707800  | -0.49341500 | 2.32084000  |
| C  | 3.28791400  | 2.18467400  | 1.41170300  |
| C  | -2.42113200 | -2.42878000 | 1.30467000  |
| C  | 2.24368500  | -2.60990700 | -1.27212200 |
| C  | -0.10928400 | -3.12213200 | 2.08840300  |
| C  | -0.11237600 | -3.15098900 | -2.05232100 |
| C  | 1.06847100  | -3.44528200 | 1.28429500  |
| C  | -1.31112500 | -3.38076800 | -1.24395500 |
| C  | -1.30815900 | -3.36223200 | 1.28544100  |
| C  | 1.06738400  | -3.46318000 | -1.24452600 |
| C  | -0.85813400 | -3.89342200 | 0.02417700  |
| C  | 0.58101000  | -3.94274400 | 0.02357700  |
| Pr | -0.05806000 | -1.49627900 | -0.00330800 |



3. 1a (B3LYP/6-31G(d)~MWB48)

|   |             |             |             |
|---|-------------|-------------|-------------|
| C | 4.65656700  | 1.43481700  | -1.99553400 |
| C | 5.26736800  | 0.81498200  | -0.90490400 |
| C | 5.28305700  | -0.62763300 | -0.79752800 |
| C | 3.93066200  | 2.67499800  | -1.81977700 |
| C | 3.91567400  | 0.62144800  | -2.94368800 |
| C | 5.04579100  | 1.35432600  | 0.42606000  |
| C | 4.69818400  | -1.41582400 | -1.79485700 |
| C | 3.84756600  | 3.27016100  | -0.55973400 |
| C | 3.93709500  | -0.76099200 | -2.84710300 |
| C | 4.36071300  | 2.54696200  | 0.59312200  |
| C | 5.07055100  | -0.96914600 | 0.59529300  |
| C | 2.74726700  | 2.61944000  | -2.66117600 |
| C | 4.81323500  | 0.25528300  | 1.33032200  |
| C | 2.68579100  | 1.30339200  | -3.26656900 |
| C | 4.00212600  | -2.63170600 | -1.44890500 |
| C | 2.63617100  | 3.94533200  | -0.14931200 |
| C | 2.73158300  | -1.51820300 | -3.08308600 |
| C | 3.41869800  | 2.68821800  | 1.67604400  |
| C | 4.39661900  | -2.13713600 | 0.92592700  |
| C | 1.58539900  | 3.26763100  | -2.26589800 |
| C | 2.83288900  | -2.73391000 | -2.30003000 |
| C | 2.41841400  | 3.65076400  | 1.24711100  |
| C | 1.45976200  | 0.59750800  | -3.37650500 |
| C | 3.80736900  | 0.32144400  | 2.32916000  |
| C | 3.90466300  | -3.03014300 | -0.10868500 |
| C | 1.53429600  | 4.00634000  | -1.01814800 |
| C | 1.48261800  | -0.87352400 | -3.29133200 |
| C | 3.08559300  | 1.59282100  | 2.51694800  |
| C | 3.46669900  | -2.14133500 | 2.02045600  |
| C | 0.30855200  | 2.64113400  | -2.48539500 |
| C | 3.16389300  | -0.94003400 | 2.71648600  |
| C | 0.24322400  | 1.32606000  | -3.00745100 |
| C | 2.69658500  | -3.63686000 | 0.38847500  |
| C | 0.19600400  | 3.87998600  | -0.50406900 |
| C | 1.68490100  | -3.35559600 | -1.82926600 |
| C | 1.12506700  | 3.56923100  | 1.74521000  |
| C | 2.43145400  | -3.11585900 | 1.71024300  |
| C | -0.58771700 | 3.06451800  | -1.42072800 |
| C | 0.27740000  | -1.59723300 | -2.86688100 |
| C | 1.74087100  | 1.58429000  | 3.11364500  |
| C | 1.61985500  | -3.87154400 | -0.47579000 |
| C | -0.01860800 | 3.73567900  | 0.86537600  |

|    |             |             |             |
|----|-------------|-------------|-------------|
| C  | 0.39146500  | -2.84301300 | -2.18369700 |
| C  | 0.79816500  | 2.59081600  | 2.73633800  |
| C  | 1.89388500  | -0.88967600 | 3.35266500  |
| C  | -0.90786900 | 0.57499100  | -2.63980000 |
| C  | 1.20649900  | 0.34739300  | 3.57296500  |
| C  | -0.90841400 | -0.84960700 | -2.60745300 |
| C  | 1.11008700  | -2.97673000 | 2.19463500  |
| C  | -1.65683300 | 2.26758300  | -0.96704400 |
| C  | 0.26906700  | -3.74803000 | -0.01630500 |
| C  | -1.08712300 | 2.90898800  | 1.35582700  |
| C  | -0.52632500 | -3.18585000 | -1.11572700 |
| C  | -0.59911800 | 2.25771300  | 2.55079500  |
| C  | 0.90718600  | -1.92323500 | 3.15776300  |
| C  | -1.89457700 | 1.04727000  | -1.70530100 |
| C  | -0.02040900 | -3.37169500 | 1.32463900  |
| C  | -1.99070400 | 2.23255100  | 0.47428800  |
| C  | -0.21458400 | 0.07729600  | 3.56554500  |
| C  | -1.93819300 | -1.27601200 | -1.68427200 |
| C  | -1.73006600 | -2.47528800 | -0.88845900 |
| C  | -1.13873900 | 1.02100300  | 2.97869900  |
| C  | -0.38015700 | -1.33772500 | 3.36293400  |
| C  | -2.57546300 | -0.08746300 | -1.16315100 |
| C  | -1.32575600 | -2.79467300 | 1.57294600  |
| C  | -2.70135700 | 1.10159700  | 1.00021900  |
| C  | -2.24078500 | -2.41337800 | 0.47531300  |
| C  | -2.29876100 | 0.53534200  | 2.26267200  |
| C  | -1.50276000 | -1.81695000 | 2.62807300  |
| C  | -3.41257600 | -0.01065200 | 0.10992900  |
| C  | -2.51812000 | -0.89937600 | 2.20839800  |
| C  | -2.99481200 | -1.27188000 | 0.91166100  |
| Pr | -0.54407500 | -0.48931600 | 0.51201000  |
| C  | -6.84873700 | 1.71821300  | 0.24351000  |
| C  | -5.49427900 | 1.42614200  | 0.38818200  |
| C  | -4.92025600 | 0.23395200  | -0.07598400 |
| C  | -5.78945700 | -0.67330200 | -0.70666600 |
| C  | -7.15039600 | -0.41055300 | -0.86519300 |
| C  | -7.67059000 | 0.78906000  | -0.38702900 |
| H  | -7.25648500 | 2.65164100  | 0.61518300  |
| H  | -4.85876200 | 2.15332800  | 0.88240300  |
| H  | -7.78932500 | -1.13544300 | -1.35495400 |
| Cl | -5.22291900 | -2.21102100 | -1.34061000 |
| Cl | -9.38021300 | 1.12223600  | -0.58573400 |

4. 1a' (B3LYP/6-31G(d)~MWB48)

|   |             |             |             |
|---|-------------|-------------|-------------|
| C | 4.64775400  | 1.83475300  | -1.61151500 |
| C | 5.26081700  | 1.01284300  | -0.66535800 |
| C | 5.30573200  | -0.41988500 | -0.86051800 |
| C | 3.89427600  | 2.99763100  | -1.19262000 |
| C | 3.93423800  | 1.22331800  | -2.71904700 |
| C | 5.01395300  | 1.25886000  | 0.74537700  |
| C | 4.74777300  | -0.99323100 | -2.00872100 |
| C | 3.78512600  | 3.31500800  | 0.16238100  |
| C | 3.98402400  | -0.14810700 | -2.91295000 |
| C | 4.30152700  | 2.37747100  | 1.14667100  |
| C | 5.08622400  | -1.04795800 | 0.42790800  |
| C | 2.72111000  | 3.09651500  | -2.04460200 |
| C | 4.79558600  | -0.00835400 | 1.39787000  |
| C | 2.69376000  | 1.93442000  | -2.91140200 |
| C | 4.07441000  | -2.26726900 | -1.93352500 |
| C | 2.55579500  | 3.86764300  | 0.68730900  |
| C | 2.79709600  | -0.86214400 | -3.31844700 |
| C | 3.34501300  | 2.27226100  | 2.22141000  |
| C | 4.43438900  | -2.27148800 | 0.49857300  |
| C | 1.54180300  | 3.62529700  | -1.53869900 |
| C | 2.91673700  | -2.21216900 | -2.80406300 |
| C | 2.32896300  | 3.28432700  | 1.98850100  |
| C | 1.48452900  | 1.24373400  | -3.18316200 |
| C | 3.77847700  | -0.17039000 | 2.37441400  |
| C | 3.97097500  | -2.93715100 | -0.70659900 |
| C | 1.46214800  | 4.08693700  | -0.16527000 |
| C | 1.53656600  | -0.21212800 | -3.40513400 |
| C | 3.02675500  | 1.02032200  | 2.81122300  |
| C | 3.49377400  | -2.52140400 | 1.55522600  |
| C | 0.28184200  | 3.03292400  | -1.90115000 |
| C | 3.15758600  | -1.49661400 | 2.48082500  |
| C | 0.25023300  | 1.85532400  | -2.68612800 |
| C | 2.77134500  | -3.65630700 | -0.36444700 |
| C | 0.12201100  | 3.83154000  | 0.29229700  |
| C | 1.77783500  | -2.94091500 | -2.49132600 |
| C | 1.03228800  | 3.07695300  | 2.44001100  |
| C | 2.48244200  | -3.42792600 | 1.03326800  |
| C | -0.63305600 | 3.20683300  | -0.78341400 |
| C | 0.34203000  | -1.03133900 | -3.15963000 |
| C | 1.67566800  | 0.86320400  | 3.37230300  |
| C | 1.70958600  | -3.72772500 | -1.27526600 |
| C | -0.10572200 | 3.40188000  | 1.59794600  |

|    |             |             |             |
|----|-------------|-------------|-------------|
| C  | 0.47738100  | -2.38899400 | -2.74885600 |
| C  | 0.71563700  | 1.90818800  | 3.20137100  |
| C  | 1.87985800  | -1.60270500 | 3.09430000  |
| C  | -0.88674200 | 1.02093200  | -2.49688400 |
| C  | 1.16282100  | -0.45140300 | 3.55560800  |
| C  | -0.86398800 | -0.37706900 | -2.76912700 |
| C  | 1.15403800  | -3.41743500 | 1.51690900  |
| C  | -1.68467600 | 2.31052300  | -0.51910400 |
| C  | 0.35182100  | -3.72728900 | -0.81963500 |
| C  | -1.16171700 | 2.46987000  | 1.88913500  |
| C  | -0.44363700 | -2.96418300 | -1.79029600 |
| C  | -0.67350900 | 1.59572800  | 2.93105900  |
| C  | 0.91818700  | -2.59112400 | 2.67377400  |
| C  | -1.89077200 | 1.26937300  | -1.49897800 |
| C  | 0.04221000  | -3.64323700 | 0.56634300  |
| C  | -2.04465300 | 1.97504700  | 0.87602700  |
| C  | -0.25203200 | -0.73978200 | 3.47000500  |
| C  | -1.89910200 | -1.00499400 | -1.97345800 |
| C  | -1.66342500 | -2.33705900 | -1.43798400 |
| C  | -1.19418500 | 0.28821300  | 3.08315000  |
| C  | -0.38295300 | -2.08473200 | 2.97766100  |
| C  | -2.56791800 | 0.04056700  | -1.22241500 |
| C  | -1.27514000 | -3.15216700 | 0.90976000  |
| C  | -2.75731100 | 0.75695500  | 1.14735600  |
| C  | -2.18428800 | -2.56922200 | -0.09821500 |
| C  | -2.34140600 | -0.05587900 | 2.26827000  |
| C  | -1.48544500 | -2.41941400 | 2.14196200  |
| C  | -3.42230100 | -0.17455300 | 0.02609900  |
| C  | -2.51361300 | -1.45262300 | 1.90917400  |
| C  | -2.95770700 | -1.55254900 | 0.55466500  |
| Pr | -0.54731100 | -0.63800700 | 0.36724000  |
| C  | -7.08898500 | -1.31089800 | -0.14525500 |
| C  | -5.70542500 | -1.26492300 | 0.00160500  |
| C  | -4.95558800 | -0.08660300 | -0.14232400 |
| C  | -5.68647000 | 1.07384300  | -0.45178200 |
| C  | -7.07453400 | 1.06198800  | -0.60172700 |
| C  | -7.76780700 | -0.13439300 | -0.44703800 |
| H  | -7.62793200 | -2.24422800 | -0.02611800 |
| H  | -5.18117500 | -2.18532600 | 0.23747600  |
| H  | -7.60017000 | 1.97938100  | -0.83754000 |
| Cl | -4.91700300 | 2.63603700  | -0.67896200 |
| Cl | -9.51003300 | -0.14899800 | -0.63698200 |

5. **1b** (B3LYP/6-31G(d)~MWB48)

|   |             |             |             |
|---|-------------|-------------|-------------|
| C | 4.59382900  | 1.53959500  | -1.93111100 |
| C | 5.19302400  | 1.02923700  | -0.77907300 |
| C | 5.29367300  | -0.39994000 | -0.57828900 |
| C | 3.78532800  | 2.73848900  | -1.86571000 |
| C | 3.94827900  | 0.62323800  | -2.85465700 |
| C | 4.87885700  | 1.63426000  | 0.50399800  |
| C | 4.80304500  | -1.28404700 | -1.54578500 |
| C | 3.60945800  | 3.40377400  | -0.65130800 |
| C | 4.05099800  | -0.74627000 | -2.66820600 |
| C | 4.11471100  | 2.78844700  | 0.56578900  |
| C | 5.04018500  | -0.66768800 | 0.82398600  |
| C | 2.64674400  | 2.55481400  | -2.74949300 |
| C | 4.67519200  | 0.58077400  | 1.46738600  |
| C | 2.69432200  | 1.20297400  | -3.27117800 |
| C | 4.16914100  | -2.51857700 | -1.15054500 |
| C | 2.34176400  | 4.02366600  | -0.33509200 |
| C | 2.90670700  | -1.59316500 | -2.90425300 |
| C | 3.11769400  | 2.93487200  | 1.59761400  |
| C | 4.42690000  | -1.85456300 | 1.20232500  |
| C | 1.43069100  | 3.15042900  | -2.44507000 |
| C | 3.04787900  | -2.74869600 | -2.04022400 |
| C | 2.07999400  | 3.80269000  | 1.06739500  |
| C | 1.52044500  | 0.41415000  | -3.38517900 |
| C | 3.62275300  | 0.64337100  | 2.41738300  |
| C | 4.03670900  | -2.83868000 | 0.20756600  |
| C | 1.27844000  | 3.95913200  | -1.24991400 |
| C | 1.63067900  | -1.04424500 | -3.20382000 |
| C | 2.81558800  | 1.87448000  | 2.49290300  |
| C | 3.45042800  | -1.85107200 | 2.25613900  |
| C | 0.20592700  | 2.43093900  | -2.67592400 |
| C | 3.04212700  | -0.63062200 | 2.85897200  |
| C | 0.24581700  | 1.08438600  | -3.11334900 |
| C | 2.84779700  | -3.49062000 | 0.69348700  |
| C | -0.07132900 | 3.77911600  | -0.78433200 |
| C | 1.92108900  | -3.41346400 | -1.57727300 |
| C | 0.77313700  | 3.66848100  | 1.51632800  |
| C | 2.49215700  | -2.90762600 | 1.96704300  |
| C | -0.76175400 | 2.86062200  | -1.67822800 |
| C | 0.45516400  | -1.81636300 | -2.78236100 |
| C | 1.44847400  | 1.81592300  | 3.03299100  |
| C | 1.82785800  | -3.84866300 | -0.19714300 |
| C | -0.33827700 | 3.70663700  | 0.58156500  |

|    |             |             |             |
|----|-------------|-------------|-------------|
| C  | 0.61590600  | -3.00606000 | -2.01467500 |
| C  | 0.46320800  | 2.73444600  | 2.55425700  |
| C  | 1.74390800  | -0.62290900 | 3.43789100  |
| C  | -0.87189500 | 0.28466300  | -2.74615900 |
| C  | 0.97200200  | 0.57840000  | 3.55034800  |
| C  | -0.78519800 | -1.13248300 | -2.62153100 |
| C  | 1.14408200  | -2.82345100 | 2.38628800  |
| C  | -1.79894700 | 2.02525600  | -1.21858400 |
| C  | 0.45266800  | -3.78429300 | 0.19842300  |
| C  | -1.37438100 | 2.84396500  | 1.07973200  |
| C  | -0.32538900 | -3.34110400 | -0.96535900 |
| C  | -0.90127500 | 2.30093000  | 2.33351700  |
| C  | 0.83286700  | -1.72797600 | 3.26931500  |
| C  | -1.92713900 | 0.74897300  | -1.88534900 |
| C  | 0.08036200  | -3.34468500 | 1.49907600  |
| C  | -2.19398200 | 2.05743400  | 0.20751700  |
| C  | -0.42813200 | 0.21690500  | 3.50218600  |
| C  | -1.82494100 | -1.56608400 | -1.71354800 |
| C  | -1.57926800 | -2.69708900 | -0.83426100 |
| C  | -1.38225000 | 1.06108000  | 2.81901300  |
| C  | -0.49626600 | -1.21547000 | 3.38354300  |
| C  | -2.55833800 | -0.39222700 | -1.29773600 |
| C  | -1.26816100 | -2.83827200 | 1.65566800  |
| C  | -2.85565100 | 0.91719400  | 0.77646800  |
| C  | -2.15451800 | -2.58461400 | 0.49965300  |
| C  | -2.47734100 | 0.45805100  | 2.08955700  |
| C  | -1.55396400 | -1.81155300 | 2.63782800  |
| C  | -3.45468100 | -0.29116300 | -0.06800700 |
| C  | -2.60454500 | -0.98885200 | 2.11888300  |
| C  | -2.99890400 | -1.47140600 | 0.83048700  |
| Pr | -0.58419000 | -0.55185500 | 0.48835900  |
| C  | -6.98366500 | 1.20088700  | -0.19794700 |
| C  | -5.62189500 | 1.02437800  | 0.03370300  |
| C  | -4.96581000 | -0.15787200 | -0.33522100 |
| C  | -5.74485500 | -1.15557200 | -0.94676800 |
| C  | -7.10971900 | -0.97825700 | -1.17670900 |
| C  | -7.74274200 | 0.20463500  | -0.80445400 |
| H  | -5.06086100 | 1.81934600  | 0.51040500  |
| H  | -7.67501200 | -1.77402400 | -1.64970600 |
| Cl | -5.05555000 | -2.68885700 | -1.45732400 |
| Cl | -7.74861500 | 2.70487700  | 0.28524900  |
| H  | -8.80291500 | 0.34579600  | -0.98297500 |

6. **1b'** (B3LYP/6-31G(d)~MWB48)

|   |             |             |             |
|---|-------------|-------------|-------------|
| C | 4.79358600  | 1.48626700  | -1.51772900 |
| C | 5.30748800  | 0.61578000  | -0.55604000 |
| C | 5.22860000  | -0.81581800 | -0.74901500 |
| C | 4.13700500  | 2.71297000  | -1.11811100 |
| C | 4.05592700  | 0.93781300  | -2.64221000 |
| C | 5.04818500  | 0.88692500  | 0.84784400  |
| C | 4.64985300  | -1.34036300 | -1.91010600 |
| C | 4.02348000  | 3.04296100  | 0.23363700  |
| C | 3.98743600  | -0.43294300 | -2.83361800 |
| C | 4.43013500  | 2.06634700  | 1.23154900  |
| C | 4.92220000  | -1.41798400 | 0.53377500  |
| C | 2.99873100  | 2.91358800  | -1.99907600 |
| C | 4.70199900  | -0.35386000 | 1.49573300  |
| C | 2.88902700  | 1.75643500  | -2.86594700 |
| C | 3.86352200  | -2.54847400 | -1.85066800 |
| C | 2.83574000  | 3.70443500  | 0.72768500  |
| C | 2.75201700  | -1.03933800 | -3.26845100 |
| C | 3.44157800  | 2.04987100  | 2.28226300  |
| C | 4.16230900  | -2.57836100 | 0.58932100  |
| C | 1.85916200  | 3.54637200  | -1.52255600 |
| C | 2.73750000  | -2.39261600 | -2.74986700 |
| C | 2.52570400  | 3.14780800  | 2.02310000  |
| C | 1.62978500  | 1.17550300  | -3.16662600 |
| C | 3.65001000  | -0.42164700 | 2.44586700  |
| C | 3.67102100  | -3.20328000 | -0.62658300 |
| C | 1.78723200  | 4.01757800  | -0.15215300 |
| C | 1.55701000  | -0.27954500 | -3.38745800 |
| C | 2.99771500  | 0.83260800  | 2.86383600  |
| C | 3.17699200  | -2.73996500 | 1.62198700  |
| C | 0.56066100  | 3.06834600  | -1.91621000 |
| C | 2.91117200  | -1.68691000 | 2.53864000  |
| C | 0.44304300  | 1.89615500  | -2.70098500 |
| C | 2.40413300  | -3.81185800 | -0.31393000 |
| C | 0.41858700  | 3.88484300  | 0.27203300  |
| C | 1.53102900  | -3.01658400 | -2.46584200 |
| C | 1.20471900  | 3.05773600  | 2.44191600  |
| C | 2.10233600  | -3.55515000 | 1.07617900  |
| C | -0.36224400 | 3.32627900  | -0.82156200 |
| C | 0.28833200  | -0.98826700 | -3.17020700 |
| C | 1.62481200  | 0.79806500  | 3.39147100  |
| C | 1.36316300  | -3.79009000 | -1.25076200 |
| C | 0.12141400  | 3.47971000  | 1.57145700  |

|    |             |             |             |
|----|-------------|-------------|-------------|
| C  | 0.29189900  | -2.35129000 | -2.75568200 |
| C  | 0.76642600  | 1.92398800  | 3.19588200  |
| C  | 1.61437500  | -1.67676700 | 3.12055200  |
| C  | -0.76881700 | 1.16764100  | -2.54012700 |
| C  | 0.99173900  | -0.46478300 | 3.56286600  |
| C  | -0.86431400 | -0.22798400 | -2.81105600 |
| C  | 0.76855000  | -3.42366300 | 1.52658900  |
| C  | -1.49616100 | 2.52869400  | -0.58285400 |
| C  | 0.00017400  | -3.66719600 | -0.82922800 |
| C  | -1.02087900 | 2.64751700  | 1.83760600  |
| C  | -0.69985200 | -2.83883000 | -1.81941500 |
| C  | -0.63774500 | 1.73579000  | 2.89111800  |
| C  | 0.57938100  | -2.57725100 | 2.67767300  |
| C  | -1.77093000 | 1.50782600  | -1.56780800 |
| C  | -0.33481800 | -3.55209400 | 0.54849200  |
| C  | -1.92008300 | 2.23145700  | 0.80309200  |
| C  | -0.44084800 | -0.62640700 | 3.44357400  |
| C  | -1.97076000 | -0.75893600 | -2.04086400 |
| C  | -1.86834600 | -2.10571200 | -1.49926400 |
| C  | -1.27673500 | 0.48055500  | 3.03133600  |
| C  | -0.67855200 | -1.95570000 | 2.94843500  |
| C  | -2.56197700 | 0.34486800  | -1.30770000 |
| C  | -1.61039900 | -2.94388400 | 0.85823400  |
| C  | -2.74415600 | 1.08172200  | 1.05736600  |
| C  | -2.43947700 | -2.28597300 | -0.17209700 |
| C  | -2.42913700 | 0.23788300  | 2.18829800  |
| C  | -1.78412100 | -2.19197200 | 2.08439600  |
| C  | -3.46092900 | 0.20962100  | -0.07926600 |
| C  | -2.71591300 | -1.13847500 | 1.82567400  |
| C  | -3.13429300 | -1.20227800 | 0.46091100  |
| Pr | -0.64858400 | -0.50549200 | 0.32572300  |
| C  | -7.20394700 | -0.56021400 | -0.31634500 |
| C  | -5.82814800 | -0.66469400 | -0.13448900 |
| C  | -4.97658600 | 0.44059800  | -0.28467500 |
| C  | -5.58480200 | 1.66039700  | -0.63002900 |
| C  | -6.96578200 | 1.76546000  | -0.80923400 |
| C  | -7.79033500 | 0.65560000  | -0.65426100 |
| H  | -5.40420100 | -1.62686700 | 0.12909500  |
| H  | -7.39151300 | 2.72744100  | -1.07330700 |
| Cl | -4.66644700 | 3.13829200  | -0.86450900 |
| Cl | -8.20826800 | -1.98501200 | -0.11435600 |
| H  | -8.86256800 | 0.73655600  | -0.79446000 |



7. 1c (B3LYP/6-31G(d)~MWB48)

|   |             |             |             |
|---|-------------|-------------|-------------|
| C | 4.83053900  | 1.61564000  | -1.66282800 |
| C | 5.39696300  | 0.78870500  | -0.69230100 |
| C | 5.36320000  | -0.64934000 | -0.84630800 |
| C | 4.14141700  | 2.82953900  | -1.27889700 |
| C | 4.08564900  | 1.01298000  | -2.75425500 |
| C | 5.16239100  | 1.08806100  | 0.71016400  |
| C | 4.77575400  | -1.22370400 | -1.97932100 |
| C | 4.04900100  | 3.19103200  | 0.06617700  |
| C | 4.06046100  | -0.36394700 | -2.90870800 |
| C | 4.51271400  | 2.25522400  | 1.07806300  |
| C | 5.10870200  | -1.22746900 | 0.45864600  |
| C | 2.97611500  | 2.96819900  | -2.13629400 |
| C | 4.87456700  | -0.14641100 | 1.39790300  |
| C | 2.88608500  | 1.78547200  | -2.96995300 |
| C | 4.03279600  | -2.45569700 | -1.86929900 |
| C | 2.85090900  | 3.82417500  | 0.57220200  |
| C | 2.83662500  | -1.02324300 | -3.29732000 |
| C | 3.55047800  | 2.23295500  | 2.15278000  |
| C | 4.39014500  | -2.41106500 | 0.56231900  |
| C | 1.82672100  | 3.57429400  | -1.64804900 |
| C | 2.88085000  | -2.36182200 | -2.74426300 |
| C | 2.59185300  | 3.29168500  | 1.88881400  |
| C | 1.64097600  | 1.15516700  | -3.22596400 |
| C | 3.84851700  | -0.22473400 | 2.37533300  |
| C | 3.89221000  | -3.08430500 | -0.62462100 |
| C | 1.77145200  | 4.07842100  | -0.28878000 |
| C | 1.61393300  | -0.30721000 | -3.40713200 |
| C | 3.16305100  | 1.01725000  | 2.77632500  |
| C | 3.43615400  | -2.57883200 | 1.62267900  |
| C | 0.53608400  | 3.04408300  | -1.99807900 |
| C | 3.15603800  | -1.51132300 | 2.51790900  |
| C | 0.44088800  | 1.84821600  | -2.75084600 |
| C | 2.65442200  | -3.72712500 | -0.26535800 |
| C | 0.41842100  | 3.91156800  | 0.17235400  |
| C | 1.70322500  | -3.01778600 | -2.41360200 |
| C | 1.28525600  | 3.16927000  | 2.34339100  |
| C | 2.37686300  | -3.44392500 | 1.12409800  |
| C | -0.36996300 | 3.30118600  | -0.88808400 |
| C | 0.37652100  | -1.05204700 | -3.14087100 |
| C | 1.80537000  | 0.95059700  | 3.33869400  |
| C | 1.59110500  | -3.76595500 | -1.17630200 |
| C | 0.16746200  | 3.53208100  | 1.48972800  |

|    |             |             |             |
|----|-------------|-------------|-------------|
| C  | 0.43608900  | -2.40226000 | -2.68918600 |
| C  | 0.90454600  | 2.04130000  | 3.13584200  |
| C  | 1.87356100  | -1.52964100 | 3.13103100  |
| C  | -0.74114000 | 1.08404200  | -2.54376900 |
| C  | 1.22109000  | -0.32878400 | 3.55854800  |
| C  | -0.79170300 | -0.32130500 | -2.77295000 |
| C  | 1.05034200  | -3.34621600 | 1.60348300  |
| C  | -1.47283600 | 2.47425800  | -0.60234200 |
| C  | 0.23518400  | -3.67866100 | -0.72383700 |
| C  | -0.93908200 | 2.66993000  | 1.80600800  |
| C  | -0.51626700 | -2.89921100 | -1.71632000 |
| C  | -0.49987400 | 1.79798600  | 2.87158000  |
| C  | 0.85923500  | -2.47545100 | 2.73594600  |
| C  | -1.72986000 | 1.41512100  | -1.55290900 |
| C  | -0.07226400 | -3.54000500 | 0.65825400  |
| C  | -1.84754900 | 2.19637600  | 0.80406200  |
| C  | -0.20738900 | -0.54209300 | 3.47947400  |
| C  | -1.85552700 | -0.87051800 | -1.95718600 |
| C  | -1.70115500 | -2.19946000 | -1.38516400 |
| C  | -1.08925800 | 0.52452500  | 3.06078600  |
| C  | -0.41263700 | -1.89142000 | 3.02262600  |
| C  | -2.45807600 | 0.22756900  | -1.23492200 |
| C  | -1.36319500 | -2.96989700 | 0.98497700  |
| C  | -2.60919400 | 1.01793200  | 1.10729200  |
| C  | -2.24037700 | -2.36616600 | -0.04103300 |
| C  | -2.25052100 | 0.21791100  | 2.25217200  |
| C  | -1.53338600 | -2.19179400 | 2.19608400  |
| C  | -3.32012100 | 0.09916500  | 0.01507800  |
| C  | -2.50724500 | -1.17719000 | 1.93309500  |
| C  | -2.96439100 | -1.29347000 | 0.58231400  |
| Pr | -0.48514400 | -0.53787600 | 0.38063900  |
| C  | -6.58573000 | 1.95422200  | -0.72019000 |
| C  | -5.23648100 | 1.68607700  | -0.51985500 |
| C  | -4.80848900 | 0.39525900  | -0.18227500 |
| C  | -5.75969900 | -0.61574100 | -0.04995800 |
| C  | -7.11783900 | -0.35395800 | -0.25046600 |
| C  | -7.53703600 | 0.93797200  | -0.58746500 |
| H  | -4.51548200 | 2.49068400  | -0.62914300 |
| Cl | -9.22035900 | 1.31839000  | -0.84736600 |
| Cl | -8.25680900 | -1.66566300 | -0.06981800 |
| H  | -5.45410200 | -1.62367600 | 0.21060100  |
| H  | -6.91692400 | 2.95374600  | -0.98081000 |

8. 1c' (B3LYP/6-31G(d)~MWB48)

|   |             |             |             |
|---|-------------|-------------|-------------|
| C | 4.50391900  | 2.31665700  | -1.46338000 |
| C | 5.20481500  | 1.45256600  | -0.62141200 |
| C | 5.35976600  | 0.05700900  | -0.97066500 |
| C | 3.66933700  | 3.36166100  | -0.90843800 |
| C | 3.81403100  | 1.76913700  | -2.61822900 |
| C | 4.97398100  | 1.52584000  | 0.81141500  |
| C | 4.82155600  | -0.43554300 | -2.16500700 |
| C | 3.56931900  | 3.52322200  | 0.47441800  |
| C | 3.96902600  | 0.43475600  | -2.95904300 |
| C | 4.18496100  | 2.53291600  | 1.34335900  |
| C | 5.22435200  | -0.72029700 | 0.24565600  |
| C | 2.47059600  | 3.45254100  | -1.72484400 |
| C | 4.87499300  | 0.18246600  | 1.32648100  |
| C | 2.51541700  | 2.39141000  | -2.71173100 |
| C | 4.25394000  | -1.76131200 | -2.21593900 |
| C | 2.31287900  | 3.91263900  | 1.07630200  |
| C | 2.83359800  | -0.32799100 | -3.41960500 |
| C | 3.26763400  | 2.23513700  | 2.41631500  |
| C | 4.67495400  | -1.99447000 | 0.19444800  |
| C | 1.26539200  | 3.82506100  | -1.14540400 |
| C | 3.07368200  | -1.70991200 | -3.05608200 |
| C | 2.16794500  | 3.17833000  | 2.31100000  |
| C | 1.35910500  | 1.63593500  | -3.03670200 |
| C | 3.89971300  | -0.16637800 | 2.29631900  |
| C | 4.23642200  | -2.56429600 | -1.06760600 |
| C | 1.18356500  | 4.12997900  | 0.27089700  |
| C | 1.52311100  | 0.22165500  | -3.41662800 |
| C | 3.06619900  | 0.90501000  | 2.87177900  |
| C | 3.78493200  | -2.43242800 | 1.23306000  |
| C | 0.04800800  | 3.17370100  | -1.54953500 |
| C | 3.39110700  | -1.54338200 | 2.26955200  |
| C | 0.09150200  | 2.08826200  | -2.45832500 |
| C | 3.10763300  | -3.41304200 | -0.78516100 |
| C | -0.12016800 | 3.71826600  | 0.72045200  |
| C | 2.00530400  | -2.55945900 | -2.80429100 |
| C | 0.90387500  | 2.81703700  | 2.75864200  |
| C | 2.83668100  | -3.35972600 | 0.63306100  |
| C | -0.85071100 | 3.15299200  | -0.40472600 |
| C | 0.40583500  | -0.71483800 | -3.24016200 |
| C | 1.74713500  | 0.57755500  | 3.43429900  |
| C | 2.03209600  | -3.47510000 | -1.68024200 |
| C | -0.27772600 | 3.13425500  | 1.97594700  |

|    |             |             |             |
|----|-------------|-------------|-------------|
| C  | 0.65929800  | -2.09251100 | -2.97882000 |
| C  | 0.70232000  | 1.55139200  | 3.39337400  |
| C  | 2.14199500  | -1.81993500 | 2.88967600  |
| C  | -0.96935000 | 1.14741700  | -2.34217000 |
| C  | 1.34713400  | -0.78792500 | 3.48434300  |
| C  | -0.83820400 | -0.20754500 | -2.76193600 |
| C  | 1.52405000  | -3.51031500 | 1.13650000  |
| C  | -1.82268500 | 2.15156500  | -0.22134500 |
| C  | 0.69077700  | -3.63707200 | -1.20514200 |
| C  | -1.24862200 | 2.09409300  | 2.18427200  |
| C  | -0.18821600 | -2.84168200 | -2.07293300 |
| C  | -0.66418100 | 1.15577200  | 3.11497500  |
| C  | 1.25213800  | -2.83436600 | 2.38027100  |
| C  | -1.96312900 | 1.20366000  | -1.30437100 |
| C  | 0.40961000  | -3.72770500 | 0.18649900  |
| C  | -2.11572700 | 1.63981500  | 1.13767500  |
| C  | -0.04141700 | -1.18215300 | 3.39264600  |
| C  | -1.79429000 | -1.00187600 | -2.01806500 |
| C  | -1.44570600 | -2.36166700 | -1.63539000 |
| C  | -1.07098900 | -0.20007500 | 3.13432000  |
| C  | -0.07734500 | -2.47323200 | 2.75779300  |
| C  | -2.51737500 | -0.10377800 | -1.14544100 |
| C  | -0.93612500 | -3.38964000 | 0.60319800  |
| C  | -2.70101700 | 0.33758600  | 1.28423200  |
| C  | -1.91695500 | -2.77975100 | -0.32065900 |
| C  | -2.20431400 | -0.55148600 | 2.30442700  |
| C  | -1.17226200 | -2.81069900 | 1.91114900  |
| C  | -3.31619000 | -0.51609600 | 0.08288100  |
| C  | -2.28079800 | -1.91333500 | 1.80027300  |
| C  | -2.75925400 | -1.90944000 | 0.45170500  |
| Pr | -0.41089600 | -0.80074700 | 0.32938100  |
| C  | -7.05839000 | -1.36053000 | 0.13815300  |
| C  | -5.67486200 | -1.48342000 | 0.25067400  |
| C  | -4.83771800 | -0.40387400 | -0.04293200 |
| C  | -5.41323400 | 0.80300300  | -0.45327900 |
| C  | -6.79662300 | 0.93423500  | -0.56629400 |
| C  | -7.62955900 | -0.15446500 | -0.26863900 |
| H  | -5.24762300 | -2.43101100 | 0.56423300  |
| Cl | -9.36627400 | -0.04031900 | -0.39799100 |
| Cl | -7.45299800 | 2.46784300  | -1.08409700 |
| H  | -4.79075500 | 1.65761900  | -0.69644100 |
| H  | -7.70612900 | -2.20113300 | 0.36306700  |

9. 2a (BLYP/3-21G~MWB48)

|   |             |             |             |
|---|-------------|-------------|-------------|
| C | -4.95906500 | 2.07637500  | -0.38822300 |
| C | -4.94917400 | 1.35296700  | -1.59115100 |
| C | -5.14093200 | -0.10138500 | -1.58579100 |
| C | -4.05965400 | 3.21768600  | -0.19909200 |
| C | -5.01576200 | 1.33892700  | 0.88188400  |
| C | -3.92414000 | 1.66167300  | -2.59663000 |
| C | -5.34987900 | -0.78532500 | -0.37373500 |
| C | -3.17731800 | 3.60471300  | -1.22633700 |
| C | -5.20472200 | -0.04229900 | 0.89002700  |
| C | -3.06775800 | 2.74819100  | -2.42122400 |
| C | -4.23972800 | -0.67751500 | -2.58830000 |
| C | -3.56660000 | 3.17635600  | 1.18055800  |
| C | -3.40817900 | 0.40417200  | -3.12576400 |
| C | -4.07321400 | 1.94887900  | 1.81008400  |
| C | -4.78326900 | -2.11452000 | -0.17121200 |
| C | -1.84322400 | 4.10119600  | -0.91156900 |
| C | -4.46925000 | -0.87048300 | 1.83441100  |
| C | -1.66193100 | 2.63072500  | -2.77533100 |
| C | -3.69569200 | -1.95121200 | -2.39329900 |
| C | -2.28721000 | 3.64714700  | 1.48177600  |
| C | -4.30851300 | -2.19306400 | 1.21441300  |
| C | -0.91545100 | 3.55476400  | -1.91047300 |
| C | -3.24535200 | 1.15291300  | 2.65793800  |
| C | -2.01108600 | 0.21748300  | -3.35753400 |
| C | -4.02027200 | -2.72696500 | -1.18673400 |
| C | -1.41427900 | 4.18609300  | 0.42955900  |
| C | -3.45600500 | -0.31918900 | 2.67895500  |
| C | -1.10329800 | 1.37974900  | -3.18076400 |
| C | -2.32129500 | -2.22063000 | -2.76285300 |
| C | -1.46538000 | 2.93640900  | 2.44570700  |
| C | -1.47718800 | -1.15615600 | -3.21424200 |
| C | -1.92177600 | 1.70604500  | 3.02207000  |
| C | -2.84756500 | -3.52455300 | -0.85313700 |
| C | -0.03832000 | 3.87142400  | 0.79773500  |
| C | -3.21386000 | -2.98930700 | 1.53729600  |
| C | 0.40525000  | 3.27787300  | -1.56413800 |
| C | -1.79860400 | -3.23321000 | -1.82745300 |
| C | -0.06486100 | 3.10885200  | 2.04282800  |
| C | -2.35327300 | -1.21553700 | 3.09765300  |
| C | 0.32681800  | 1.14958800  | -2.88059200 |
| C | -2.48342900 | -3.72559500 | 0.49404700  |
| C | 0.89363000  | 3.48668000  | -0.19000000 |

|    |             |             |             |
|----|-------------|-------------|-------------|
| C  | -2.26317400 | -2.54243600 | 2.53983000  |
| C  | 1.06441700  | 2.10615700  | -2.10425300 |
| C  | -0.07609600 | -1.32199800 | -2.99505800 |
| C  | -0.90912900 | 0.80918300  | 3.47485100  |
| C  | 0.80809300  | -0.19360200 | -2.84302700 |
| C  | -1.12596200 | -0.62729600 | 3.54133600  |
| C  | -0.41988400 | -3.30392900 | -1.47410900 |
| C  | 0.92123600  | 2.11706400  | 2.32745900  |
| C  | -1.09421700 | -3.80370800 | 0.88385700  |
| C  | 1.93269800  | 2.52015700  | 0.07589800  |
| C  | -0.97356900 | -3.12491400 | 2.20274500  |
| C  | 2.08310600  | 1.67724400  | -1.14622800 |
| C  | 0.47217400  | -2.42262700 | -2.21001500 |
| C  | 0.49351000  | 1.04249400  | 3.19429000  |
| C  | -0.04108700 | -3.66809800 | -0.07972000 |
| C  | 2.00522000  | 1.84705500  | 1.34157100  |
| C  | 1.95592900  | -0.59657900 | -2.02931400 |
| C  | 0.15528000  | -1.29096600 | 3.36762000  |
| C  | 0.24739200  | -2.53942700 | 2.63162600  |
| C  | 2.58506600  | 0.35173500  | -1.12189900 |
| C  | 1.76772400  | -2.01390900 | -1.70732400 |
| C  | 1.16493500  | -0.24121700 | 3.18788200  |
| C  | 1.27324200  | -3.25316200 | 0.41411800  |
| C  | 2.69252900  | 0.56778400  | 1.39171600  |
| C  | 1.43177200  | -2.75557800 | 1.80110300  |
| C  | 3.40830900  | -0.12236200 | 0.13316400  |
| C  | 2.24032300  | -2.50235000 | -0.42753500 |
| C  | 2.30422300  | -0.44114300 | 2.35982700  |
| C  | 2.99960900  | -1.61727400 | 0.42155600  |
| C  | 2.50430200  | -1.77208500 | 1.78420400  |
| Pr | 0.53482600  | -0.70577200 | 0.35942300  |
| C  | 6.87614300  | 1.38571400  | 0.95802100  |
| C  | 5.50498900  | 1.07982800  | 0.97328700  |
| C  | 4.92624600  | 0.17061600  | 0.05557000  |
| C  | 5.79709500  | -0.41845300 | -0.88003100 |
| C  | 7.16875800  | -0.14266200 | -0.92756700 |
| C  | 7.68297900  | 0.76428400  | 0.00275300  |
| H  | 7.30190800  | 2.08857700  | 1.67122200  |
| H  | 4.85978900  | 1.55073300  | 1.71455300  |
| H  | 7.80829600  | -0.62253500 | -1.66388400 |
| Cl | 5.17832100  | -1.63075400 | -2.13391300 |
| Cl | 9.48962400  | 1.14504200  | -0.04051400 |

10. **2a'** (BLYP/3-21G~MWB48)

|   |             |             |             |
|---|-------------|-------------|-------------|
| C | -4.94029700 | 2.08579700  | -0.35823300 |
| C | -4.94074500 | 1.39716300  | -1.58144200 |
| C | -5.14901500 | -0.05427200 | -1.61740000 |
| C | -4.02748100 | 3.21063800  | -0.13847400 |
| C | -5.00283100 | 1.31302100  | 0.89061600  |
| C | -3.91457600 | 1.72279600  | -2.58036400 |
| C | -5.36342700 | -0.77015800 | -0.42496200 |
| C | -3.14278100 | 3.61657800  | -1.15638500 |
| C | -5.20713100 | -0.06558500 | 0.85936800  |
| C | -3.04562800 | 2.79403800  | -2.37628900 |
| C | -4.25663900 | -0.61143000 | -2.63839200 |
| C | -3.53236600 | 3.12454000  | 1.23830000  |
| C | -3.41394700 | 0.47530800  | -3.14689400 |
| C | -4.05113200 | 1.88544600  | 1.83369900  |
| C | -4.81148100 | -2.11092500 | -0.26184500 |
| C | -1.80280300 | 4.08822900  | -0.83044700 |
| C | -4.47912300 | -0.92877700 | 1.77783700  |
| C | -1.64222600 | 2.67088000  | -2.73814000 |
| C | -3.72606500 | -1.89572000 | -2.48063500 |
| C | -2.24747200 | 3.57306900  | 1.55036400  |
| C | -4.33537900 | -2.23484500 | 1.12037000  |
| C | -0.88370000 | 3.56078800  | -1.84823700 |
| C | -3.22993000 | 1.05603000  | 2.65566200  |
| C | -2.01960700 | 0.27957100  | -3.38875900 |
| C | -4.05713500 | -2.70200400 | -1.29611000 |
| C | -1.37078600 | 4.13181000  | 0.51180200  |
| C | -3.45721500 | -0.41348500 | 2.63503900  |
| C | -1.09835700 | 1.42575900  | -3.18141500 |
| C | -2.35531000 | -2.16921500 | -2.86063200 |
| C | -1.43124100 | 2.82499900  | 2.49086300  |
| C | -1.49980500 | -1.10336400 | -3.28722400 |
| C | -1.89965900 | 1.58392900  | 3.03202500  |
| C | -2.89296400 | -3.52207700 | -0.98818200 |
| C | 0.00167900  | 3.79011600  | 0.86800200  |
| C | -3.24943300 | -3.05252500 | 1.41794300  |
| C | 0.43308700  | 3.25681600  | -1.51288000 |
| C | -1.84264800 | -3.21359700 | -1.95576900 |
| C | -0.02918100 | 2.99335200  | 2.08976500  |
| C | -2.36355100 | -1.33370700 | 3.02484700  |
| C | 0.33063100  | 1.17016000  | -2.89358700 |
| C | -2.52948800 | -3.76609400 | 0.35216900  |
| C | 0.92417900  | 3.41836000  | -0.13332000 |

|    |             |             |             |
|----|-------------|-------------|-------------|
| C  | -2.29141800 | -2.64588500 | 2.43136600  |
| C  | 1.07841200  | 2.09483000  | -2.08915500 |
| C  | -0.09923500 | -1.29191800 | -3.07990600 |
| C  | -0.89490200 | 0.66300500  | 3.45500900  |
| C  | 0.79888300  | -0.17819300 | -2.89931200 |
| C  | -1.12711300 | -0.77136200 | 3.47886200  |
| C  | -0.46423300 | -3.30838200 | -1.60861400 |
| C  | 0.94742100  | 1.98191100  | 2.34260900  |
| C  | -1.14086400 | -3.87097600 | 0.73661100  |
| C  | 1.94484200  | 2.42936300  | 0.10358300  |
| C  | -1.00910600 | -3.23313900 | 2.07467000  |
| C  | 2.09195000  | 1.62666400  | -1.14436500 |
| C  | 0.43556400  | -2.41988400 | -2.32567800 |
| C  | 0.51010400  | 0.88894800  | 3.18094700  |
| C  | -0.08961900 | -3.71480200 | -0.22523200 |
| C  | 2.02402900  | 1.72450500  | 1.34848900  |
| C  | 1.94299300  | -0.61684600 | -2.09506500 |
| C  | 0.14690500  | -1.44331000 | 3.28559300  |
| C  | 0.21961900  | -2.67404800 | 2.51750700  |
| C  | 2.58049000  | 0.29738300  | -1.15647500 |
| C  | 1.73324000  | -2.03827300 | -1.81116400 |
| C  | 1.17173900  | -0.39953000 | 3.13629900  |
| C  | 1.22732100  | -3.32883900 | 0.27838400  |
| C  | 2.72868900  | 0.44861300  | 1.37104900  |
| C  | 1.39878700  | -2.87596200 | 1.67787300  |
| C  | 3.41072700  | -0.22641300 | 0.07672400  |
| C  | 2.19323500  | -2.56221300 | -0.54359900 |
| C  | 2.31955700  | -0.58558400 | 2.30849700  |
| C  | 2.96057000  | -1.71069000 | 0.32789600  |
| C  | 2.48467200  | -1.90510900 | 1.68916200  |
| Pr | 0.53206600  | -0.74139400 | 0.34929900  |
| C  | 6.93606200  | -1.21676200 | -1.12474500 |
| C  | 5.56546000  | -1.19724500 | -0.82918300 |
| C  | 4.94612400  | -0.11710500 | -0.14609800 |
| C  | 5.78741500  | 0.94681100  | 0.22661200  |
| C  | 7.16489700  | 0.95904300  | -0.04065700 |
| C  | 7.71378900  | -0.12952200 | -0.71815100 |
| H  | 7.38606500  | -2.05690700 | -1.64969300 |
| H  | 4.94787900  | -2.04466300 | -1.12674300 |
| H  | 7.78062900  | 1.79772900  | 0.27354800  |
| Cl | 5.16554400  | 2.44746100  | 1.11397300  |
| Cl | 9.52441600  | -0.12727900 | -1.07889800 |



11. **2b** (BLYP/3-21G~MWB48)

|   |             |             |             |
|---|-------------|-------------|-------------|
| C | -4.82715300 | 2.20110300  | -0.45289700 |
| C | -4.91875700 | 1.32870800  | -1.54815500 |
| C | -5.17399200 | -0.10053900 | -1.34180800 |
| C | -3.87075200 | 3.31115200  | -0.46328800 |
| C | -4.84180400 | 1.63875600  | 0.90486400  |
| C | -3.94270000 | 1.45261900  | -2.63834800 |
| C | -5.33934200 | -0.61036000 | -0.04046200 |
| C | -3.03457300 | 3.51752300  | -1.57781400 |
| C | -5.08920200 | 0.28136300  | 1.10495000  |
| C | -3.03204200 | 2.50849600  | -2.65331500 |
| C | -4.35941100 | -0.84677200 | -2.30492400 |
| C | -3.30028200 | 3.42450400  | 0.88172400  |
| C | -3.51450600 | 0.11255900  | -3.02438300 |
| C | -3.82161700 | 2.31631800  | 1.69436000  |
| C | -4.82156000 | -1.92965500 | 0.30598400  |
| C | -1.66350000 | 3.98156000  | -1.40139200 |
| C | -4.33708500 | -0.45372100 | 2.11085500  |
| C | -1.65579500 | 2.27460900  | -3.06182000 |
| C | -3.86043700 | -2.11021600 | -1.97214200 |
| C | -1.98571300 | 3.86380800  | 1.04985300  |
| C | -4.27030600 | -1.85204600 | 1.66347300  |
| C | -0.82102900 | 3.26325000  | -2.36634900 |
| C | -2.98037100 | 1.59547500  | 2.59468600  |
| C | -2.14273700 | -0.17313100 | -3.30308700 |
| C | -4.14696900 | -2.70665400 | -0.65837800 |
| C | -1.15312800 | 4.21869700  | -0.10797000 |
| C | -3.25350100 | 0.15090100  | 2.82104200  |
| C | -1.17694100 | 0.95504000  | -3.32876900 |
| C | -2.52203500 | -2.49303500 | -2.37363300 |
| C | -1.14048700 | 3.24266700  | 2.05435700  |
| C | -1.66081500 | -1.54094500 | -3.00505000 |
| C | -1.61461300 | 2.12264600  | 2.81156100  |
| C | -2.99141500 | -3.51133600 | -0.28396100 |
| C | 0.22709700  | 3.88387600  | 0.22591500  |
| C | -3.19398500 | -2.65440000 | 2.03051300  |
| C | 0.50392700  | 2.96662000  | -2.05612900 |
| C | -1.99039300 | -3.40259700 | -1.34189400 |
| C | 0.24011200  | 3.29079600  | 1.55979100  |
| C | -2.16734700 | -0.73865500 | 3.29481800  |
| C | 0.25701400  | 0.69281600  | -3.07539400 |
| C | -2.55833900 | -3.55548900 | 1.05716600  |
| C | 1.08222700  | 3.32821700  | -0.75029400 |

|    |             |             |             |
|----|-------------|-------------|-------------|
| C  | -2.16732300 | -2.12905600 | 2.91327300  |
| C  | 1.07836200  | 1.70322200  | -2.46979700 |
| C  | -0.25758400 | -1.74910700 | -2.84153000 |
| C  | -0.61721800 | 1.24216300  | 3.32676100  |
| C  | 0.68215400  | -0.65676100 | -2.88778700 |
| C  | -0.89220900 | -0.16091900 | 3.59434900  |
| C  | -0.59760700 | -3.49496500 | -1.05419900 |
| C  | 1.19797800  | 2.29676000  | 1.92158100  |
| C  | -1.15308100 | -3.65175800 | 1.38026000  |
| C  | 2.09148400  | 2.35257300  | -0.41342500 |
| C  | -0.92613800 | -2.81376800 | 2.58887200  |
| C  | 2.13128400  | 1.35113500  | -1.51888900 |
| C  | 0.28682900  | -2.76358200 | -1.94552600 |
| C  | 0.77502700  | 1.36539000  | 2.94288800  |
| C  | -0.15344500 | -3.69452700 | 0.35336900  |
| C  | 2.21051100  | 1.84822200  | 0.92488700  |
| C  | 1.85684600  | -1.00857000 | -2.08808600 |
| C  | 0.34744200  | -0.90512600 | 3.44170100  |
| C  | 0.34277600  | -2.24193300 | 2.87424000  |
| C  | 2.57453400  | 0.01616000  | -1.34542300 |
| C  | 1.62627000  | -2.36013500 | -1.56992700 |
| C  | 1.38917900  | 0.06012900  | 3.07157200  |
| C  | 1.20496200  | -3.28719800 | 0.71930900  |
| C  | 2.84482800  | 0.55319600  | 1.10784800  |
| C  | 1.46691300  | -2.62314200 | 2.01826800  |
| C  | 3.45078400  | -0.33026000 | -0.08639800 |
| C  | 2.15210400  | -2.70105100 | -0.26390300 |
| C  | 2.47042400  | -0.30206000 | 2.21955400  |
| C  | 2.99945300  | -1.75379000 | 0.41949600  |
| C  | 2.57785600  | -1.70481100 | 1.81477800  |
| Pr | 0.57784000  | -0.73342800 | 0.37259800  |
| C  | 6.99601900  | 1.11610100  | 0.25359700  |
| C  | 5.63039700  | 0.89513300  | 0.43410300  |
| C  | 4.97086400  | -0.11998700 | -0.29915300 |
| C  | 5.75755200  | -0.87128000 | -1.19273200 |
| C  | 7.12776100  | -0.64856400 | -1.37030400 |
| C  | 7.76790300  | 0.36613300  | -0.63663800 |
| H  | 5.06387800  | 1.49921100  | 1.13987700  |
| H  | 7.68879900  | -1.26180500 | -2.07329000 |
| Cl | 5.01680100  | -2.23089000 | -2.20586400 |
| Cl | 7.80939600  | 2.45697200  | 1.23415700  |
| H  | 8.83162600  | 0.56040600  | -0.75832000 |

12. **2b'** (BLYP/3-21G~MWB48)

|   |             |             |             |
|---|-------------|-------------|-------------|
| C | -5.06400100 | 1.68023800  | -0.47794700 |
| C | -4.99034200 | 0.92976600  | -1.66167000 |
| C | -5.06401200 | -0.53449700 | -1.61964000 |
| C | -4.26148100 | 2.89539400  | -0.31563400 |
| C | -5.06779900 | 0.97386500  | 0.81105500  |
| C | -3.98842100 | 1.29411600  | -2.67190500 |
| C | -5.22282500 | -1.20148000 | -0.39098000 |
| C | -3.40754200 | 3.32527700  | -1.35002200 |
| C | -5.14483000 | -0.41734600 | 0.85431500  |
| C | -3.22347900 | 2.45017300  | -2.52261500 |
| C | -4.11432600 | -1.06131800 | -2.60434400 |
| C | -3.77362800 | 2.92901400  | 1.06608800  |
| C | -3.37018000 | 0.06962700  | -3.16803100 |
| C | -4.18272400 | 1.68191300  | 1.72653900  |
| C | -4.55281800 | -2.47544300 | -0.15270300 |
| C | -2.11948500 | 3.93501800  | -1.04384200 |
| C | -4.34980800 | -1.15925100 | 1.82211600  |
| C | -1.81138600 | 2.43802700  | -2.87122600 |
| C | -3.47001700 | -2.28123500 | -2.37528600 |
| C | -2.53818500 | 3.50872200  | 1.35892700  |
| C | -4.08046700 | -2.47970400 | 1.23638800  |
| C | -1.14634600 | 3.44023800  | -2.02731700 |
| C | -3.29659400 | 0.97671400  | 2.59625800  |
| C | -1.96116200 | -0.00907000 | -3.39170700 |
| C | -3.73741600 | -3.04963600 | -1.15013200 |
| C | -1.70676400 | 4.09041600  | 0.29633500  |
| C | -3.38791300 | -0.50621400 | 2.65484300  |
| C | -1.15074800 | 1.22644300  | -3.24410300 |
| C | -2.07577600 | -2.44602300 | -2.73338700 |
| C | -1.66604700 | 2.89085300  | 2.34263400  |
| C | -1.31788700 | -1.32993600 | -3.21079000 |
| C | -2.02348800 | 1.64389700  | 2.94949900  |
| C | -2.50494300 | -3.73947300 | -0.79220200 |
| C | -0.31281200 | 3.89480700  | 0.67677600  |
| C | -2.92684300 | -3.17631500 | 1.58259400  |
| C | 0.18893000  | 3.27571600  | -1.66941000 |
| C | -1.47834700 | -3.38936600 | -1.77115200 |
| C | -0.28202200 | 3.16631100  | 1.94011800  |
| C | -2.21749800 | -1.29914100 | 3.09844100  |
| C | 0.29309200  | 1.11861400  | -2.93574000 |
| C | -2.13399900 | -3.87743100 | 0.56095200  |
| C | 0.64823100  | 3.55450300  | -0.29852900 |

|    |             |             |             |
|----|-------------|-------------|-------------|
| C  | -2.01952400 | -2.62787700 | 2.57564900  |
| C  | 0.94477800  | 2.14977400  | -2.17871800 |
| C  | 0.09238800  | -1.37835700 | -2.98747000 |
| C  | -0.94284800 | 0.84433200  | 3.42922900  |
| C  | 0.88355300  | -0.17906000 | -2.86399000 |
| C  | -1.04278900 | -0.60231800 | 3.53024800  |
| C  | -0.10030400 | -3.33806600 | -1.41255100 |
| C  | 0.78154800  | 2.26550800  | 2.25407200  |
| C  | -0.74554500 | -3.83069300 | 0.95606900  |
| C  | 1.74997100  | 2.67635900  | -0.00297200 |
| C  | -0.68609200 | -3.11142600 | 2.25668900  |
| C  | 1.98611000  | 1.82712900  | -1.20381500 |
| C  | 0.72177200  | -2.41043200 | -2.17232300 |
| C  | 0.43804900  | 1.18357200  | 3.14822300  |
| C  | 0.29593000  | -3.63165700 | -0.00776400 |
| C  | 1.88859100  | 2.05658000  | 1.28069600  |
| C  | 2.05887700  | -0.46712800 | -2.03612900 |
| C  | 0.28951600  | -1.16328300 | 3.37657700  |
| C  | 0.48206300  | -2.42136100 | 2.67715700  |
| C  | 2.60225800  | 0.55215300  | -1.14497200 |
| C  | 1.97608500  | -1.88507300 | -1.67521500 |
| C  | 1.21529000  | -0.03904400 | 3.17467000  |
| C  | 1.56794400  | -3.10084100 | 0.48063100  |
| C  | 2.71124100  | 0.85618300  | 1.37618700  |
| C  | 1.68157200  | -2.55705600 | 1.85367200  |
| C  | 3.46363000  | 0.17339100  | 0.11958100  |
| C  | 2.46846600  | -2.29551500 | -0.37824100 |
| C  | 2.38297300  | -0.16175100 | 2.36345600  |
| C  | 3.14005100  | -1.32755500 | 0.44982100  |
| C  | 2.67179700  | -1.49071400 | 1.81674100  |
| Pr | 0.64374800  | -0.58873900 | 0.39395600  |
| C  | 7.12365300  | -0.61151500 | -0.72248600 |
| C  | 5.75482300  | -0.72600400 | -0.48972000 |
| C  | 4.99293000  | 0.39989200  | -0.08145700 |
| C  | 5.69757000  | 1.60884400  | 0.07044000  |
| C  | 7.07706600  | 1.71758100  | -0.15629600 |
| C  | 7.81280300  | 0.59283200  | -0.56261200 |
| H  | 5.26274900  | -1.68894200 | -0.61263000 |
| H  | 7.56926700  | 2.67802800  | -0.01431700 |
| Cl | 4.86817200  | 3.17799500  | 0.58989700  |
| Cl | 8.05951200  | -2.11534900 | -1.25413200 |
| H  | 8.88366600  | 0.65640500  | -0.74431200 |

13. 2c (BLYP/3-21G~MWB48)

|   |             |             |             |
|---|-------------|-------------|-------------|
| C | -5.09719100 | 1.93071500  | -0.46202200 |
| C | -5.01706000 | 1.26497500  | -1.69497400 |
| C | -5.15336300 | -0.19364800 | -1.76215600 |
| C | -4.25041800 | 3.09450700  | -0.18774200 |
| C | -5.17205500 | 1.13428900  | 0.77086800  |
| C | -3.96938100 | 1.65686000  | -2.64689100 |
| C | -5.37997700 | -0.93987300 | -0.59093700 |
| C | -3.34632600 | 3.55964800  | -1.16235000 |
| C | -5.30913600 | -0.25167100 | 0.70998700  |
| C | -3.16107800 | 2.76349700  | -2.38935600 |
| C | -4.19641100 | -0.69018500 | -2.75524000 |
| C | -3.80617500 | 3.00806900  | 1.20607900  |
| C | -3.38756500 | 0.44439800  | -3.21246900 |
| C | -4.28806100 | 1.73537500  | 1.76083600  |
| C | -4.77136300 | -2.25588700 | -0.42694700 |
| C | -2.04471800 | 4.08941800  | -0.77553900 |
| C | -4.57762100 | -1.09551600 | 1.64326300  |
| C | -1.74043600 | 2.71393600  | -2.69597300 |
| C | -3.61109300 | -1.95091700 | -2.59654600 |
| C | -2.55679200 | 3.51010900  | 1.57583600  |
| C | -4.34501300 | -2.38149100 | 0.97154100  |
| C | -1.06161900 | 3.62290500  | -1.76269100 |
| C | -3.46158100 | 0.93140400  | 2.60259600  |
| C | -1.97665400 | 0.31935700  | -3.39861600 |
| C | -3.94938200 | -2.79257200 | -1.43897400 |
| C | -1.66761900 | 4.12946700  | 0.58331100  |
| C | -3.61718400 | -0.54717800 | 2.54972500  |
| C | -1.12040600 | 1.50386400  | -3.13621500 |
| C | -2.21483700 | -2.15179700 | -2.92473400 |
| C | -1.74393100 | 2.78574200  | 2.53702100  |
| C | -1.39634700 | -1.03873200 | -3.29715500 |
| C | -2.17353500 | 1.51434200  | 3.03957200  |
| C | -2.75961300 | -3.56121600 | -1.09719000 |
| C | -0.29494600 | 3.84861600  | 0.98939000  |
| C | -3.23265000 | -3.15109700 | 1.29912400  |
| C | 0.25460000  | 3.37792700  | -1.37927200 |
| C | -1.68832500 | -3.18743400 | -2.01677700 |
| C | -0.33698800 | 3.02871600  | 2.19664900  |
| C | -2.49638400 | -1.42090200 | 2.96774500  |
| C | 0.30594400  | 1.31175500  | -2.79414700 |
| C | -2.43727100 | -3.81046800 | 0.25242600  |
| C | 0.68544500  | 3.54186100  | 0.02058200  |

|    |             |             |             |
|----|-------------|-------------|-------------|
| C  | -2.33676400 | -2.71733400 | 2.35679700  |
| C  | 0.97577900  | 2.25717300  | -1.94553200 |
| C  | 0.00225200  | -1.16469200 | -3.03489700 |
| C  | -1.14460100 | 0.63563700  | 3.49055300  |
| C  | 0.83771600  | -0.01327600 | -2.80209700 |
| C  | -1.30883600 | -0.80889500 | 3.48316000  |
| C  | -0.32148100 | -3.22494600 | -1.61568900 |
| C  | 0.67694500  | 2.06265000  | 2.47612000  |
| C  | -1.06134800 | -3.85683500 | 0.69049800  |
| C  | 1.74859800  | 2.60254600  | 0.28312700  |
| C  | -1.01462800 | -3.23686900 | 2.04348900  |
| C  | 1.97220500  | 1.82098400  | -0.96903300 |
| C  | 0.56250400  | -2.28002100 | -2.27935000 |
| C  | 0.25767300  | 0.93282800  | 3.27386800  |
| C  | 0.01967700  | -3.63931800 | -0.22548900 |
| C  | 1.80772000  | 1.87866100  | 1.52263100  |
| C  | 1.97111000  | -0.41163700 | -1.96367000 |
| C  | 0.00234900  | -1.41675500 | 3.32870500  |
| C  | 0.16678400  | -2.62735400 | 2.54295700  |
| C  | 2.51790600  | 0.51489400  | -0.98312500 |
| C  | 1.82243000  | -1.84806400 | -1.71022500 |
| C  | 0.97774700  | -0.32351600 | 3.23494300  |
| C  | 1.29910600  | -3.20144200 | 0.33582900  |
| C  | 2.54892800  | 0.62735200  | 1.54517400  |
| C  | 1.38746000  | -2.75980000 | 1.74795300  |
| C  | 3.31539700  | 0.01246300  | 0.27613900  |
| C  | 2.26509300  | -2.37762700 | -0.43502700 |
| C  | 2.15695400  | -0.44102100 | 2.44608800  |
| C  | 2.95242900  | -1.50148300 | 0.48169100  |
| C  | 2.42004800  | -1.73781400 | 1.81650900  |
| Pr | 0.46543200  | -0.68116400 | 0.37542100  |
| C  | 6.72977200  | 1.78788800  | 0.60118200  |
| C  | 5.35874100  | 1.50684800  | 0.72681400  |
| C  | 4.82147600  | 0.32071600  | 0.18373400  |
| C  | 5.67434600  | -0.58264200 | -0.48361000 |
| C  | 7.03784700  | -0.29484800 | -0.60381400 |
| C  | 7.56520900  | 0.88283200  | -0.06614200 |
| H  | 5.28447700  | -1.51045700 | -0.90072900 |
| Cl | 9.35106300  | 1.27948300  | -0.20583400 |
| H  | 4.71087900  | 2.20907400  | 1.25057600  |
| H  | 7.15468700  | 2.69900500  | 1.01927300  |
| Cl | 8.10713000  | -1.50769900 | -1.47477500 |

14. **2c'** (BLYP/3-21G~MWB48)

|   |             |             |             |
|---|-------------|-------------|-------------|
| C | -4.88881300 | 2.34847900  | -0.16181600 |
| C | -4.98817800 | 1.66791900  | -1.38550900 |
| C | -5.28545400 | 0.23179100  | -1.41592900 |
| C | -3.90001200 | 3.41475200  | 0.01824500  |
| C | -4.94099400 | 1.57431700  | 1.08662600  |
| C | -3.99174100 | 1.93663600  | -2.43036800 |
| C | -5.48793000 | -0.47636900 | -0.21671500 |
| C | -3.04045600 | 3.77225900  | -1.03858100 |
| C | -5.22976500 | 0.21068000  | 1.06096600  |
| C | -3.05048100 | 2.95197100  | -2.26375100 |
| C | -4.47686900 | -0.37299900 | -2.47885000 |
| C | -3.34758500 | 3.29109100  | 1.36965900  |
| C | -3.59432900 | 0.66379200  | -3.02245600 |
| C | -3.91303400 | 2.08268600  | 1.98606800  |
| C | -5.01039000 | -1.84857900 | -0.08321900 |
| C | -1.66074800 | 4.16133300  | -0.77478700 |
| C | -4.51375100 | -0.70015100 | 1.94209100  |
| C | -1.67510300 | 2.74651300  | -2.69086900 |
| C | -4.01914900 | -1.68873400 | -2.34979700 |
| C | -2.02502800 | 3.65934900  | 1.62278700  |
| C | -4.47915000 | -2.00857400 | 1.27496900  |
| C | -0.82337300 | 3.58411100  | -1.83532900 |
| C | -3.10657100 | 1.20036000  | 2.76559900  |
| C | -2.22711200 | 0.38529800  | -3.32856900 |
| C | -4.34299100 | -2.47966300 | -1.15285500 |
| C | -1.16443800 | 4.16941600  | 0.54597700  |
| C | -3.42444200 | -0.25230400 | 2.75277700  |
| C | -1.22920500 | 1.47230900  | -3.16044000 |
| C | -2.68655800 | -2.04253300 | -2.79348200 |
| C | -1.21325100 | 2.85845600  | 2.52245900  |
| C | -1.78905200 | -1.02685100 | -3.25279100 |
| C | -1.73100600 | 1.64501600  | 3.08173400  |
| C | -3.21696600 | -3.36983600 | -0.90122200 |
| C | 0.19946000  | 3.74292300  | 0.83628200  |
| C | -3.43238500 | -2.89252700 | 1.51919200  |
| C | 0.48679900  | 3.19906000  | -1.56166700 |
| C | -2.19618300 | -3.12145700 | -1.91543300 |
| C | 0.17579700  | 2.94287600  | 2.05657800  |
| C | -2.37186200 | -1.23886900 | 3.08799700  |
| C | 0.19259400  | 1.12925000  | -2.93919300 |
| C | -2.80709000 | -3.64358200 | 0.41969800  |
| C | 1.05287900  | 3.32464100  | -0.20698300 |

|    |             |             |             |
|----|-------------|-------------|-------------|
| C  | -2.40524300 | -2.54925800 | 2.48700000  |
| C  | 1.03223400  | 2.00310200  | -2.16959100 |
| C  | -0.39446300 | -1.30143000 | -3.10977500 |
| C  | -0.76624800 | 0.66351400  | 3.45729500  |
| C  | 0.57611400  | -0.24583000 | -2.96919700 |
| C  | -1.08483500 | -0.75503600 | 3.48747700  |
| C  | -0.81165300 | -3.30389700 | -1.63319800 |
| C  | 1.10173900  | 1.87627400  | 2.26514500  |
| C  | -1.41045200 | -3.83410900 | 0.73859600  |
| C  | 2.02808700  | 2.27779000  | -0.02098900 |
| C  | -1.17896000 | -3.21123200 | 2.07064700  |
| C  | 2.05912900  | 1.46977900  | -1.27476500 |
| C  | 0.10704900  | -2.46461800 | -2.38563800 |
| C  | 0.63494600  | 0.80489300  | 3.11554500  |
| C  | -0.39644900 | -3.74280300 | -0.27067400 |
| C  | 2.11720200  | 1.56222200  | 1.22040600  |
| C  | 1.72867300  | -0.75799900 | -2.22436900 |
| C  | 0.13455600  | -1.50239100 | 3.23196400  |
| C  | 0.10043600  | -2.73107000 | 2.45829200  |
| C  | 2.45682900  | 0.11180400  | -1.31226300 |
| C  | 1.45102700  | -2.16845000 | -1.93526200 |
| C  | 1.21099100  | -0.52219200 | 3.03924300  |
| C  | 0.96630100  | -3.44091100 | 0.17144200  |
| C  | 2.72052300  | 0.23861400  | 1.20281900  |
| C  | 1.22592400  | -3.00305800 | 1.56404800  |
| C  | 3.30082500  | -0.46202700 | -0.11713900 |
| C  | 1.94452200  | -2.73170100 | -0.69313200 |
| C  | 2.29644000  | -0.77427800 | 2.15307900  |
| C  | 2.79848200  | -1.92858500 | 0.14580400  |
| C  | 2.36392900  | -2.09736500 | 1.52536000  |
| Pr | 0.41409600  | -0.84366700 | 0.24378700  |
| C  | 6.83037000  | -0.94453800 | -1.58177900 |
| C  | 5.44954600  | -1.06474200 | -1.36471000 |
| C  | 4.81965500  | -0.32515000 | -0.33858400 |
| C  | 5.58975000  | 0.53615400  | 0.46484300  |
| C  | 6.96783000  | 0.65056700  | 0.24112000  |
| C  | 7.58626200  | -0.08272300 | -0.77327500 |
| H  | 4.86210800  | -1.73458600 | -1.99378700 |
| H  | 5.12335400  | 1.11303100  | 1.26183900  |
| H  | 7.32648900  | -1.51159600 | -2.36775400 |
| Cl | 7.92759700  | 1.78597800  | 1.31936800  |
| Cl | 9.38966600  | 0.04861300  | -1.08483700 |



15. 3a (BLYP/3-21G~MWB48)

|   |             |             |             |
|---|-------------|-------------|-------------|
| C | -5.50303300 | 0.49922200  | -0.05361300 |
| C | -5.31644700 | -0.01693100 | -1.34632200 |
| C | -4.94874700 | -1.42142200 | -1.53146100 |
| C | -5.08265900 | 1.86296800  | 0.26770200  |
| C | -5.19144200 | -0.35001400 | 1.10510800  |
| C | -4.55760600 | 0.77716300  | -2.32258600 |
| C | -4.80373400 | -2.27237800 | -0.42241700 |
| C | -4.49324000 | 2.67550300  | -0.71496100 |
| C | -4.85697400 | -1.69092600 | 0.92647700  |
| C | -4.16493200 | 2.08095200  | -2.02071400 |
| C | -3.96523100 | -1.48336500 | -2.62267200 |
| C | -4.50786300 | 1.84377100  | 1.62286800  |
| C | -3.64778500 | -0.11232900 | -3.03128800 |
| C | -4.47990700 | 0.45362700  | 2.09052500  |
| C | -3.76346000 | -3.30327300 | -0.41157500 |
| C | -3.41701400 | 3.60413500  | -0.36488600 |
| C | -3.79858500 | -2.29065700 | 1.73225000  |
| C | -2.84309300 | 2.55146600  | -2.41190400 |
| C | -2.97364600 | -2.46618300 | -2.61199500 |
| C | -3.48388600 | 2.72656200  | 1.95743500  |
| C | -3.20692400 | -3.37039800 | 0.93810300  |
| C | -2.44315700 | 3.58642100  | -1.44690500 |
| C | -3.35723500 | -0.06928400 | 2.80380600  |
| C | -2.30228600 | 0.28161800  | -3.31985800 |
| C | -2.89865900 | -3.44621200 | -1.51823900 |
| C | -2.95904000 | 3.68102100  | 0.97527300  |
| C | -3.00613400 | -1.50296500 | 2.62990200  |
| C | -1.88328400 | 1.67246500  | -3.00507700 |
| C | -1.62368400 | -2.13273700 | -3.02960700 |
| C | -2.38583500 | 2.26600900  | 2.79981900  |
| C | -1.28262300 | -0.78466200 | -3.36381200 |
| C | -2.31290800 | 0.89473100  | 3.21426100  |
| C | -1.49310800 | -3.76234300 | -1.31454800 |
| C | -1.54446400 | 3.84820700  | 1.25463000  |
| C | -1.86759900 | -3.72935900 | 1.12992600  |
| C | -1.08477200 | 3.79335200  | -1.17744300 |
| C | -0.69591100 | -2.98056600 | -2.26328500 |
| C | -1.18647400 | 3.00143500  | 2.40947400  |
| C | -1.62235100 | -1.95733900 | 2.89546600  |
| C | -0.44789200 | 1.97994500  | -2.78744000 |
| C | -0.99410400 | -3.98188100 | -0.01753900 |
| C | -0.62148200 | 3.98362900  | 0.20533000  |

|    |             |             |             |
|----|-------------|-------------|-------------|
| C  | -1.08556600 | -3.07639900 | 2.16438100  |
| C  | -0.07689800 | 3.05600800  | -1.89919500 |
| C  | 0.09287500  | -0.42023000 | -3.19116000 |
| C  | -1.00739200 | 0.40092200  | 3.51404000  |
| C  | 0.51527900  | 0.93846600  | -2.96341600 |
| C  | -0.67006900 | -1.00819700 | 3.39516900  |
| C  | 0.61757300  | -2.54446700 | -1.94065000 |
| C  | 0.11036500  | 2.43832300  | 2.54504100  |
| C  | 0.34936100  | -3.55115000 | 0.33826300  |
| C  | 0.71282500  | 3.42300900  | 0.31317400  |
| C  | 0.30253400  | -3.06538000 | 1.71332000  |
| C  | 1.07185600  | 2.90114600  | -1.00050900 |
| C  | 1.05362300  | -1.31170200 | -2.55644600 |
| C  | 0.18755200  | 1.18520600  | 3.26134000  |
| C  | 1.20928300  | -2.89134500 | -0.61414700 |
| C  | 1.12987700  | 2.69032000  | 1.48908600  |
| C  | 1.79218100  | 0.90266300  | -2.23183900 |
| C  | 0.74918500  | -1.10296900 | 3.10743500  |
| C  | 1.25623900  | -2.10124600 | 2.18604200  |
| C  | 2.05536000  | 1.86403300  | -1.16718900 |
| C  | 2.14391300  | -0.50410200 | -2.01939000 |
| C  | 1.28570200  | 0.26285000  | 3.06348700  |
| C  | 2.31495100  | -2.09657100 | -0.10788700 |
| C  | 2.24747100  | 1.79435000  | 1.34037200  |
| C  | 2.38642200  | -1.76706000 | 1.33323900  |
| C  | 2.77820500  | 1.43571000  | 0.01590000  |
| C  | 2.85379300  | -0.93999300 | -0.85388000 |
| C  | 2.36737700  | 0.57607400  | 2.19301800  |
| C  | 3.57209600  | 0.07682300  | 0.08727600  |
| C  | 3.03415000  | -0.46117700 | 1.46332300  |
| Pr | 0.62780200  | -0.09925200 | 0.17119800  |
| C  | 6.98770700  | 1.74754000  | -0.62358100 |
| C  | 5.61489700  | 1.51932700  | -0.43202700 |
| C  | 5.09964900  | 0.24574400  | -0.08857800 |
| C  | 6.04141300  | -0.79064400 | 0.05405800  |
| C  | 7.41740100  | -0.60671700 | -0.12674700 |
| C  | 7.86477000  | 0.67251000  | -0.46632000 |
| H  | 7.36124100  | 2.73440700  | -0.88904900 |
| H  | 4.91546800  | 2.34742000  | -0.55023000 |
| H  | 8.11055700  | -1.43499800 | -0.00472500 |
| Cl | 5.52610800  | -2.51297800 | 0.50660400  |
| Cl | 9.67577100  | 0.93798300  | -0.71342600 |

16. 3a' (BLYP/3-21G~MWB48)

|   |             |             |             |
|---|-------------|-------------|-------------|
| C | -5.48031300 | 0.62995200  | -0.18775300 |
| C | -5.33266800 | -0.23229200 | -1.28638400 |
| C | -5.03029300 | -1.64836500 | -1.07507200 |
| C | -4.99328300 | 2.00726400  | -0.25880900 |
| C | -5.18868300 | 0.12160700  | 1.16074700  |
| C | -4.55416600 | 0.22395200  | -2.44674000 |
| C | -4.90786500 | -2.16466400 | 0.22669200  |
| C | -4.38350700 | 2.48709200  | -1.42952400 |
| C | -4.91578300 | -1.23000200 | 1.36062200  |
| C | -4.10055300 | 1.54037500  | -2.51932100 |
| C | -4.06577100 | -2.05539200 | -2.10691000 |
| C | -4.40102600 | 2.33836400  | 1.04731000  |
| C | -3.69408500 | -0.86838900 | -2.88024600 |
| C | -4.42800700 | 1.13325900  | 1.88244300  |
| C | -3.91392100 | -3.19922500 | 0.52220200  |
| C | -3.26114000 | 3.42507700  | -1.35281800 |
| C | -3.87366900 | -1.63144300 | 2.30032300  |
| C | -2.76404600 | 1.82313000  | -3.02844500 |
| C | -3.11797300 | -3.04128100 | -1.82469300 |
| C | -3.33402100 | 3.23100900  | 1.12151500  |
| C | -3.34101500 | -2.91376700 | 1.83605000  |
| C | -2.30508400 | 3.06451500  | -2.39031900 |
| C | -3.31905000 | 0.77700800  | 2.71137200  |
| C | -2.33657500 | -0.63211000 | -3.26752500 |
| C | -3.07138800 | -3.68281200 | -0.50260100 |
| C | -2.78194400 | 3.84924600  | -0.08803200 |
| C | -3.03460300 | -0.66320300 | 2.94286600  |
| C | -1.85207500 | 0.77041700  | -3.35266200 |
| C | -1.76160200 | -2.90060200 | -2.32104400 |
| C | -2.24486800 | 2.97034300  | 2.05602300  |
| C | -1.36660600 | -1.71441700 | -3.01475300 |
| C | -2.22715100 | 1.76645700  | 2.83552100  |
| C | -1.67845600 | -3.99420500 | -0.21972900 |
| C | -1.35593300 | 4.01959700  | 0.13126200  |
| C | -2.01673800 | -3.26878500 | 2.12019700  |
| C | -0.93398800 | 3.27526400  | -2.19044800 |
| C | -0.86084600 | -3.54472300 | -1.34894100 |
| C | -1.01966200 | 3.51204500  | 1.47545000  |
| C | -1.66894900 | -1.09023000 | 3.32449600  |
| C | -0.40111900 | 1.06132100  | -3.23087500 |
| C | -1.17172300 | -3.87055200 | 1.08743200  |
| C | -0.44422100 | 3.81769500  | -0.91573700 |

|    |             |             |             |
|----|-------------|-------------|-------------|
| C  | -1.19164800 | -2.39166300 | 2.93089800  |
| C  | 0.03073000  | 2.32174000  | -2.67991100 |
| C  | 0.02560800  | -1.37861400 | -2.95063400 |
| C  | -0.94070100 | 1.31557300  | 3.25999000  |
| C  | 0.51215000  | -0.03295400 | -3.11117200 |
| C  | -0.66818300 | -0.08542300 | 3.53966800  |
| C  | 0.47465800  | -3.09839000 | -1.16153600 |
| C  | 0.25208900  | 2.94833700  | 1.75979100  |
| C  | 0.19392400  | -3.42026200 | 1.30715000  |
| C  | 0.86677300  | 3.24631000  | -0.65846500 |
| C  | 0.19009800  | -2.57254900 | 2.49501100  |
| C  | 1.18987600  | 2.37172100  | -1.77706800 |
| C  | 0.95377400  | -2.10223400 | -2.09397700 |
| C  | 0.28342600  | 1.94230100  | 2.79661100  |
| C  | 1.07002800  | -3.09316600 | 0.20910900  |
| C  | 1.26667300  | 2.84976700  | 0.67349300  |
| C  | 1.79767600  | 0.07651800  | -2.40028700 |
| C  | 0.74098100  | -0.32361200 | 3.28553200  |
| C  | 1.19261700  | -1.56162800 | 2.68080100  |
| C  | 2.12799700  | 1.28573900  | -1.64966600 |
| C  | 2.08347500  | -1.22921000 | -1.80424600 |
| C  | 1.33429800  | 0.94905900  | 2.85744200  |
| C  | 2.22160400  | -2.24607600 | 0.47584500  |
| C  | 2.33723500  | 1.89332100  | 0.77468700  |
| C  | 2.33082500  | -1.53275600 | 1.77098900  |
| C  | 2.84660000  | 1.16863700  | -0.39422700 |
| C  | 2.78838900  | -1.35688600 | -0.56150900 |
| C  | 2.41353300  | 0.95713000  | 1.93457700  |
| C  | 3.57058400  | -0.16125900 | 0.05578500  |
| C  | 3.02686300  | -0.26861800 | 1.52502400  |
| Pr | 0.62278200  | -0.17184500 | 0.17938600  |
| C  | 6.98933600  | -1.34263200 | -1.30307300 |
| C  | 5.61709900  | -1.22255400 | -1.02902100 |
| C  | 5.09976500  | -0.21757600 | -0.17629100 |
| C  | 6.03904300  | 0.66376400  | 0.39173500  |
| C  | 7.41492700  | 0.57848700  | 0.14703100  |
| C  | 7.86436400  | -0.43321600 | -0.70547200 |
| H  | 7.36429000  | -2.12185600 | -1.96354000 |
| H  | 4.91724000  | -1.92361200 | -1.48470000 |
| H  | 8.10683900  | 1.27799600  | 0.60896400  |
| Cl | 5.52482400  | 2.03031000  | 1.53596800  |
| Cl | 9.67486900  | -0.56369800 | -1.04485400 |

17. **3b** (BLYP/3-21G~MWB48)

|   |             |             |             |
|---|-------------|-------------|-------------|
| C | -5.40207900 | 0.80047700  | -0.02544200 |
| C | -5.24141600 | 0.35874600  | -1.34903400 |
| C | -4.96793400 | -1.05218300 | -1.62516000 |
| C | -4.89094600 | 2.10784100  | 0.38563700  |
| C | -5.15520100 | -0.14236100 | 1.07515100  |
| C | -4.42393800 | 1.16208000  | -2.26917400 |
| C | -4.88918800 | -1.98258200 | -0.57486700 |
| C | -4.24138100 | 2.94125000  | -0.53962900 |
| C | -4.91069000 | -1.48796600 | 0.80919900  |
| C | -3.94547400 | 2.41302700  | -1.88084200 |
| C | -3.98354400 | -1.10882600 | -2.71549500 |
| C | -4.32832600 | 1.96105300  | 1.73815700  |
| C | -3.57125800 | 0.26131600  | -3.03228800 |
| C | -4.39791000 | 0.54450700  | 2.11298700  |
| C | -3.92172600 | -3.08072800 | -0.62993600 |
| C | -3.10678100 | 3.76965500  | -0.12690900 |
| C | -3.90164900 | -2.21040500 | 1.57653800  |
| C | -2.59175000 | 2.81691100  | -2.23731000 |
| C | -3.06187000 | -2.15554200 | -2.76869800 |
| C | -3.24854700 | 2.74764600  | 2.13199400  |
| C | -3.37939300 | -3.27296100 | 0.71359700  |
| C | -2.12897000 | 3.75700300  | -1.20552000 |
| C | -3.31775700 | -0.09963200 | 2.79283200  |
| C | -2.20023800 | 0.58082200  | -3.29100200 |
| C | -3.06097500 | -3.20854500 | -1.74203500 |
| C | -2.65388600 | 3.72690300  | 1.21629000  |
| C | -3.06292700 | -1.53877700 | 2.52492300  |
| C | -1.68973000 | 1.91602800  | -2.88471300 |
| C | -1.68941500 | -1.88791900 | -3.16098000 |
| C | -2.19023900 | 2.15883500  | 2.94486200  |
| C | -1.25538700 | -0.54700700 | -3.40314100 |
| C | -2.21315200 | 0.76153000  | 3.26837600  |
| C | -1.68132800 | -3.63039400 | -1.55577700 |
| C | -1.23309400 | 3.77879500  | 1.50990200  |
| C | -2.06919900 | -3.73428200 | 0.88409500  |
| C | -0.76151300 | 3.85228400  | -0.91877800 |
| C | -0.82685100 | -2.84453100 | -2.44989600 |
| C | -0.94121000 | 2.83420400  | 2.60590100  |
| C | -1.71578500 | -2.10485900 | 2.76538300  |
| C | -0.23791900 | 2.11121600  | -2.64426200 |
| C | -1.20732200 | -3.97050100 | -0.27565100 |
| C | -0.29581300 | 3.91968200  | 0.47398400  |
| C | -1.25139500 | -3.20658700 | 1.96096000  |

|    |             |             |             |
|----|-------------|-------------|-------------|
| C  | 0.19949000  | 3.09775800  | -1.68526800 |
| C  | 0.14087200  | -0.28868400 | -3.20584700 |
| C  | -0.94631300 | 0.16093400  | 3.53869600  |
| C  | 0.65314100  | 1.02042000  | -2.88783000 |
| C  | -0.70428000 | -1.25756700 | 3.32899900  |
| C  | 0.51129200  | -2.52111700 | -2.09716000 |
| C  | 0.31346500  | 2.17643300  | 2.70670000  |
| C  | 0.15873800  | -3.65407200 | 0.10980700  |
| C  | 0.99773900  | 3.26508100  | 0.54773800  |
| C  | 0.13703600  | -3.26000900 | 1.51415500  |
| C  | 1.32989700  | 2.80766000  | -0.79732400 |
| C  | 1.03375300  | -1.28263800 | -2.62717900 |
| C  | 0.30102800  | 0.87683900  | 3.33907300  |
| C  | 1.06746200  | -2.99413500 | -0.79517700 |
| C  | 1.35503800  | 2.42801500  | 1.67234000  |
| C  | 1.91969500  | 0.84923300  | -2.15651600 |
| C  | 0.70729500  | -1.43012600 | 3.03830900  |
| C  | 1.15134800  | -2.39789700 | 2.05272100  |
| C  | 2.24162600  | 1.71855700  | -1.03027900 |
| C  | 2.17233400  | -0.58939600 | -2.03533300 |
| C  | 1.33449600  | -0.10360800 | 3.08207300  |
| C  | 2.22215000  | -2.31454700 | -0.23448700 |
| C  | 2.41100000  | 1.46985800  | 1.46721900  |
| C  | 2.30645000  | -2.08617600 | 1.22543000  |
| C  | 2.92538700  | 1.16348800  | 0.12347400  |
| C  | 2.84275500  | -1.15011800 | -0.90012200 |
| C  | 2.44228600  | 0.19214500  | 2.23869800  |
| C  | 3.62190000  | -0.24901100 | 0.10688200  |
| C  | 3.04094800  | -0.83842200 | 1.44280800  |
| Pr | 0.67594300  | -0.22503100 | 0.17917500  |
| C  | 7.12954100  | 1.18889200  | -0.50987400 |
| C  | 5.75029700  | 1.08041800  | -0.33428600 |
| C  | 5.15967700  | -0.17726800 | -0.06172000 |
| C  | 6.03203700  | -1.27894600 | 0.02042100  |
| C  | 7.41634200  | -1.16842500 | -0.15508900 |
| C  | 7.98532100  | 0.08828600  | -0.42780600 |
| H  | 5.11802600  | 1.96383600  | -0.40453900 |
| H  | 8.04328500  | -2.05512200 | -0.07911700 |
| Cl | 5.40094000  | -2.98435300 | 0.37820500  |
| H  | 9.05830100  | 0.19933600  | -0.57068000 |
| Cl | 7.84629300  | 2.85648900  | -0.86689900 |

18. **3b'** (BLYP/3-21G~MWB48)

|   |            |             |             |
|---|------------|-------------|-------------|
| C | 5.44642700 | -0.30856700 | -0.36065400 |
| C | 5.21507500 | 0.70777300  | -1.30239000 |
| C | 4.83360500 | 2.04921700  | -0.85883400 |
| C | 5.04127100 | -1.68522500 | -0.64533700 |
| C | 5.16309900 | -0.04340700 | 1.05775100  |
| C | 4.43206400 | 0.39444800  | -2.50570200 |
| C | 4.71726600 | 2.34003800  | 0.51146000  |
| C | 4.42778100 | -2.00897400 | -1.86682100 |
| C | 4.81352900 | 1.23801200  | 1.47855000  |
| C | 4.05745100 | -0.91945500 | -2.78355500 |
| C | 3.81839600 | 2.55517300  | -1.79416000 |
| C | 4.50732500 | -2.25917500 | 0.60050700  |
| C | 3.49666800 | 1.48531900  | -2.74235200 |
| C | 4.48544300 | -1.20442900 | 1.61989200  |
| C | 3.67185500 | 3.24785600  | 0.98899000  |
| C | 3.36668100 | -3.01718400 | -1.92282500 |
| C | 3.77639800 | 1.41585200  | 2.48992500  |
| C | 2.72646700 | -1.20203300 | -3.30808100 |
| C | 2.82121300 | 3.41993200  | -1.33821000 |
| C | 3.49856200 | -3.21825000 | 0.54871800  |
| C | 3.15495900 | 2.72021100  | 2.24988600  |
| C | 2.36110000 | -2.55648000 | -2.87006000 |
| C | 3.38102600 | -1.05755200 | 2.51560300  |
| C | 2.14551500 | 1.22753400  | -3.13772200 |
| C | 2.77328900 | 3.83540100  | 0.07185200  |
| C | 2.94990400 | -3.66841400 | -0.73466200 |
| C | 3.01552300 | 0.30560500  | 2.98121000  |
| C | 1.74394100 | -0.17138200 | -3.44128900 |
| C | 1.46234400 | 3.27412700  | -1.82629400 |
| C | 2.42289300 | -3.18179400 | 1.53318100  |
| C | 1.11967100 | 2.19183400  | -2.69617800 |
| C | 2.35507400 | -2.12264400 | 2.49819100  |
| C | 1.37287200 | 4.00713900  | 0.42590200  |
| C | 1.54421200 | -3.96472400 | -0.51966600 |
| C | 1.82022000 | 2.93937200  | 2.61108200  |
| C | 1.01187800 | -2.88341100 | -2.68114400 |
| C | 0.55228400 | 3.69549400  | -0.74642700 |
| C | 1.21649200 | -3.70050500 | 0.89503300  |
| C | 1.63863900 | 0.57825100  | 3.45185100  |
| C | 0.31735400 | -0.56979900 | -3.34009900 |
| C | 0.91160100 | 3.64308300  | 1.70484200  |
| C | 0.59201100 | -3.65523400 | -1.50287400 |

|    |             |             |             |
|----|-------------|-------------|-------------|
| C  | 1.07310300  | 1.89321300  | 3.28573600  |
| C  | -0.02224000 | -1.92743800 | -2.99187100 |
| C  | -0.24767300 | 1.76275600  | -2.66269000 |
| C  | 1.05578800  | -1.82694300 | 3.01112800  |
| C  | -0.65572400 | 0.43029400  | -3.02691000 |
| C  | 0.70655100  | -0.50957500 | 3.51847600  |
| C  | -0.74737000 | 3.13810000  | -0.60896200 |
| C  | -0.07811000 | -3.27111700 | 1.28921000  |
| C  | -0.41794100 | 3.07813800  | 1.87474600  |
| C  | -0.74275800 | -3.21791200 | -1.13241600 |
| C  | -0.32920700 | 2.05309500  | 2.91084800  |
| C  | -1.14879200 | -2.19569100 | -2.08716600 |
| C  | -1.19209000 | 2.27745100  | -1.68136300 |
| C  | -0.14053900 | -2.44758200 | 2.47470500  |
| C  | -1.30094700 | 2.87274300  | 0.75380400  |
| C  | -1.12827600 | -3.06666500 | 0.25295600  |
| C  | -1.90920700 | 0.12523800  | -2.31784100 |
| C  | -0.72118500 | -0.32533700 | 3.33529900  |
| C  | -1.26480700 | 0.96373400  | 2.95109900  |
| C  | -2.14576300 | -1.20651700 | -1.76805600 |
| C  | -2.25639900 | 1.29691300  | -1.51438900 |
| C  | -1.24849700 | -1.54921800 | 2.71801400  |
| C  | -2.39118700 | 1.92252800  | 0.90128100  |
| C  | -2.25226500 | -2.21056800 | 0.52822300  |
| C  | -2.42421300 | 1.00765200  | 2.06728900  |
| C  | -2.83732900 | -1.34021900 | -0.49889300 |
| C  | -2.93124200 | 1.17783700  | -0.25555000 |
| C  | -2.35172900 | -1.47940100 | 1.82557100  |
| C  | -3.62355500 | -0.14808900 | 0.17321300  |
| C  | -3.04754800 | -0.24433300 | 1.63048500  |
| Pr | -0.68281300 | 0.02168100  | 0.25815400  |
| C  | -7.13372400 | 1.00448300  | -0.86421800 |
| C  | -5.75455500 | 0.95871000  | -0.66372200 |
| C  | -5.16157200 | -0.15078500 | -0.01426300 |
| C  | -6.03118700 | -1.17486200 | 0.40624700  |
| C  | -7.41558400 | -1.12710800 | 0.20519300  |
| C  | -7.98702700 | -0.01830200 | -0.44416300 |
| H  | -5.12106500 | 1.77603300  | -1.00448000 |
| H  | -8.04104700 | -1.94695300 | 0.55394900  |
| Cl | -5.40089300 | -2.68489000 | 1.27975600  |
| Cl | -7.85434600 | 2.47672800  | -1.72140800 |
| H  | -9.06031900 | 0.04095400  | -0.61327500 |



19. 3c (BLYP/3-21G~MWB48)

|   |            |             |             |
|---|------------|-------------|-------------|
| C | 5.60198900 | -0.26639900 | -0.02335100 |
| C | 5.40055300 | 0.28565000  | -1.29878000 |
| C | 4.96977500 | 1.67739100  | -1.43919000 |
| C | 5.24277300 | -1.65865800 | 0.24594200  |
| C | 5.24063100 | 0.52597600  | 1.16098500  |
| C | 4.68770000 | -0.50790200 | -2.30957700 |
| C | 4.77477700 | 2.48026800  | -0.30211500 |
| C | 4.70038600 | -2.46251200 | -0.77027200 |
| C | 4.84487100 | 1.85521400  | 1.02599400  |
| C | 4.35459700 | -1.83824700 | -2.05733700 |
| C | 3.99278400 | 1.73160000  | -2.53687600 |
| C | 4.65636000 | -1.71413900 | 1.59496300  |
| C | 3.74267100 | 0.36234500  | -2.99483200 |
| C | 4.55918800 | -0.34432100 | 2.11026800  |
| C | 3.68664500 | 3.45967500  | -0.26545500 |
| C | 3.66579600 | -3.45217500 | -0.46338600 |
| C | 3.75234300 | 2.37584100  | 1.84204200  |
| C | 3.05960400 | -2.35674700 | -2.47754300 |
| C | 2.95584500 | 2.66604400  | -2.50174300 |
| C | 3.67258800 | -2.65504200 | 1.88827900  |
| C | 3.11659800 | 3.45286700  | 1.07987600  |
| C | 2.70124200 | -3.44268000 | -1.55352900 |
| C | 3.40712300 | 0.10002000  | 2.83042700  |
| C | 2.41983300 | -0.08368000 | -3.30980600 |
| C | 2.82520800 | 3.60104900  | -1.37445100 |
| C | 3.20119600 | -3.59768700 | 0.86844100  |
| C | 2.99047800 | 1.52059600  | 2.70337300  |
| C | 2.06419300 | -1.50313600 | -3.04870000 |
| C | 1.62651500 | 2.28433400  | -2.94308900 |
| C | 2.54683800 | -2.27568300 | 2.73445400  |
| C | 1.35216900 | 0.93470200  | -3.32683800 |
| C | 2.40634600 | -0.92515700 | 3.19654500  |
| C | 1.40507700 | 3.84417400  | -1.17382000 |
| C | 1.79371500 | -3.84061000 | 1.12780600  |
| C | 1.76057000 | 3.74283000  | 1.27148200  |
| C | 1.35160400 | -3.72333100 | -1.30482400 |
| C | 0.65340800 | 3.06084400  | -2.15706000 |
| C | 1.38699300 | -3.05268100 | 2.30784000  |
| C | 1.58520600 | 1.90087100  | 2.97167700  |
| C | 0.64343100 | -1.88556000 | -2.85483800 |
| C | 0.88568300 | 3.99376300  | 0.12551400  |
| C | 0.88697000 | -3.98237400 | 0.06578600  |

|    |             |             |             |
|----|-------------|-------------|-------------|
| C  | 1.00174100  | 3.01896800  | 2.27531200  |
| C  | 0.31585900  | -3.00841000 | -2.00917900 |
| C  | -0.00602500 | 0.49993800  | -3.18051900 |
| C  | 1.07663700  | -0.50372800 | 3.50108000  |
| C  | -0.36598800 | -0.88382000 | -3.00306800 |
| C  | 0.67426600  | 0.89152400  | 3.42914700  |
| C  | -0.64083000 | 2.55288300  | -1.86268200 |
| C  | 0.06442700  | -2.55578600 | 2.44979100  |
| C  | -0.43845200 | 3.48883500  | 0.45246700  |
| C  | -0.47380900 | -3.48996600 | 0.18031300  |
| C  | -0.38104600 | 2.96009000  | 1.81190100  |
| C  | -0.84723900 | -2.94003800 | -1.11723200 |
| C  | -1.01284100 | 1.32319600  | -2.52601800 |
| C  | -0.07731300 | -1.33416300 | 3.20846700  |
| C  | -1.25915200 | 2.82543400  | -0.53101300 |
| C  | -0.93464800 | -2.81950000 | 1.37713300  |
| C  | -1.64853400 | -0.93342400 | -2.28243600 |
| C  | -0.74536800 | 0.93006500  | 3.13078800  |
| C  | -1.29176700 | 1.93643900  | 2.24148600  |
| C  | -1.87944100 | -1.94655800 | -1.25736200 |
| C  | -2.06772900 | 0.44740600  | -2.02795400 |
| C  | -1.21542700 | -0.45831100 | 3.03296100  |
| C  | -2.33384900 | 1.96476200  | -0.06378900 |
| C  | -2.09218100 | -1.97249400 | 1.24802000  |
| C  | -2.40077600 | 1.58175600  | 1.36727900  |
| C  | -2.63412900 | -1.59716400 | -0.06758000 |
| C  | -2.80466900 | 0.80711900  | -0.85398600 |
| C  | -2.27404200 | -0.79155500 | 2.14359500  |
| C  | -3.47713400 | -0.27491500 | 0.04503600  |
| C  | -2.97684500 | 0.23885000  | 1.44096600  |
| Pr | -0.55469500 | 0.03176300  | 0.15950500  |
| C  | -6.96674500 | -1.77086300 | -0.67445600 |
| C  | -5.57377800 | -1.65235200 | -0.52257500 |
| C  | -4.99837200 | -0.42975300 | -0.12341400 |
| C  | -5.83693700 | 0.67955600  | 0.12201200  |
| C  | -7.22045100 | 0.55364300  | -0.02965000 |
| C  | -7.78558200 | -0.66364600 | -0.42506400 |
| H  | -4.93434700 | -2.51413600 | -0.71467600 |
| Cl | -9.59944700 | -0.85108500 | -0.63083700 |
| Cl | -8.26906900 | 2.02436700  | 0.30582200  |
| H  | -7.41852200 | -2.71163100 | -0.98466400 |
| H  | -5.42000100 | 1.63786500  | 0.42943800  |

20. 3c' (BLYP/3-21G~MWB48)

|   |             |             |             |
|---|-------------|-------------|-------------|
| C | -5.40064000 | 0.94886600  | 0.08440700  |
| C | -5.37929800 | 0.09553600  | -1.03080900 |
| C | -5.16474800 | -1.34133000 | -0.85394300 |
| C | -4.82316400 | 2.28988500  | 0.00043000  |
| C | -5.06802900 | 0.40071600  | 1.40758200  |
| C | -4.63984500 | 0.51472400  | -2.23036100 |
| C | -5.00223000 | -1.88435800 | 0.43246900  |
| C | -4.25129800 | 2.74510000  | -1.19897600 |
| C | -4.87888300 | -0.96937000 | 1.57542300  |
| C | -4.09961200 | 1.79753000  | -2.31445300 |
| C | -4.29330400 | -1.79847000 | -1.94610100 |
| C | -4.13394000 | 2.55833600  | 1.27255500  |
| C | -3.88532000 | -0.62802300 | -2.72723000 |
| C | -4.19695900 | 1.34567100  | 2.09433400  |
| C | -4.06824200 | -2.99010900 | 0.65715600  |
| C | -3.06283200 | 3.60128800  | -1.17796500 |
| C | -3.81465800 | -1.45665800 | 2.44739700  |
| C | -2.77806100 | 1.99485000  | -2.89805100 |
| C | -3.40179200 | -2.85201400 | -1.73116800 |
| C | -3.00487500 | 3.37352200  | 1.29390600  |
| C | -3.40149800 | -2.76609000 | 1.93827400  |
| C | -2.19663600 | 3.19147400  | -2.27459200 |
| C | -3.06962300 | 0.90055100  | 2.85200500  |
| C | -2.53866400 | -0.47981900 | -3.19019500 |
| C | -3.32278200 | -3.51501300 | -0.42098100 |
| C | -2.48205400 | 3.97067200  | 0.06112000  |
| C | -2.87337100 | -0.55924700 | 3.04876000  |
| C | -1.96238400 | 0.88664000  | -3.28811600 |
| C | -2.07005000 | -2.79692200 | -2.30421900 |
| C | -1.88439800 | 3.02424700  | 2.15977900  |
| C | -1.63405400 | -1.63060600 | -3.00641900 |
| C | -1.90577700 | 1.81017200  | 2.92324100  |
| C | -1.94138600 | -3.92704000 | -0.22508100 |
| C | -1.03758100 | 4.03949500  | 0.19787800  |
| C | -2.09134400 | -3.21712100 | 2.13969300  |
| C | -0.80486200 | 3.30240600  | -2.15305100 |
| C | -1.16148400 | -3.51863100 | -1.39555300 |
| C | -0.66002100 | 3.48934800  | 1.51426400  |
| C | -1.52186300 | -1.08611000 | 3.34466600  |
| C | -0.48999700 | 1.07403100  | -3.24892800 |
| C | -1.35201400 | -3.85983400 | 1.05164200  |
| C | -0.20501700 | 3.79004900  | -0.90330100 |

|    |             |             |             |
|----|-------------|-------------|-------------|
| C  | -1.16081700 | -2.41181800 | 2.91011000  |
| C  | 0.06085900  | 2.29255400  | -2.71000000 |
| C  | -0.22042900 | -1.39403600 | -3.02121100 |
| C  | -0.63163300 | 1.26379500  | 3.26399100  |
| C  | 0.34938400  | -0.08295900 | -3.19411900 |
| C  | -0.44218300 | -0.15699900 | 3.50989200  |
| C  | 0.21071100  | -3.16841500 | -1.28192700 |
| C  | 0.58326100  | 2.83391400  | 1.71556400  |
| C  | 0.05231400  | -3.50835800 | 1.19540100  |
| C  | 1.07553100  | 3.12555500  | -0.73105300 |
| C  | 0.17725100  | -2.68076200 | 2.39116900  |
| C  | 1.27105300  | 2.24824600  | -1.87661000 |
| C  | 0.70311800  | -2.19343400 | -2.22944800 |
| C  | 0.60359100  | 1.81071500  | 2.73578100  |
| C  | 0.88371900  | -3.22569000 | 0.05154600  |
| C  | 1.52262200  | 2.68077000  | 0.56972800  |
| C  | 1.67744000  | -0.07362800 | -2.55827700 |
| C  | 0.92993900  | -0.48811600 | 3.17369500  |
| C  | 1.25889200  | -1.74610200 | 2.53084900  |
| C  | 2.13589600  | 1.09777500  | -1.81659000 |
| C  | 1.90606500  | -1.40476200 | -1.99619500 |
| C  | 1.58573300  | 0.74778200  | 2.72700300  |
| C  | 2.10585100  | -2.46506900 | 0.25942200  |
| C  | 2.52689600  | 1.65081000  | 0.59739500  |
| C  | 2.34231300  | -1.78268900 | 1.55530500  |
| C  | 2.91568400  | 0.91054900  | -0.60700000 |
| C  | 2.67061100  | -1.60042900 | -0.79893200 |
| C  | 2.60548600  | 0.69437100  | 1.74055400  |
| C  | 3.57036500  | -0.47192400 | -0.21528000 |
| C  | 3.10720200  | -0.56448100 | 1.28118600  |
| Pr | 0.64194700  | -0.28398500 | 0.09120100  |
| C  | 6.79952700  | -1.86658100 | -1.80188800 |
| C  | 5.45789300  | -1.65411100 | -1.44745200 |
| C  | 5.07934500  | -0.63547000 | -0.54323700 |
| C  | 6.10694000  | 0.16721700  | -0.00357400 |
| C  | 7.44458000  | -0.04727300 | -0.35607400 |
| C  | 7.80696400  | -1.05793600 | -1.25370000 |
| H  | 4.67611500  | -2.28426700 | -1.87079400 |
| Cl | 5.72458800  | 1.52007500  | 1.18545400  |
| H  | 8.85540500  | -1.19959100 | -1.50949600 |
| Cl | 8.79471700  | 0.98756500  | 0.34639800  |
| H  | 7.06107900  | -2.65900600 | -2.50317900 |

## 21. 4a (BLYP/3-21G~MWB48)

|   |             |             |             |
|---|-------------|-------------|-------------|
| C | -4.54905400 | 2.63238600  | 0.72043600  |
| C | -5.03883600 | 1.90788000  | -0.37874500 |
| C | -5.42395000 | 0.50393000  | -0.22614000 |
| C | -3.48269900 | 3.61531200  | 0.53493000  |
| C | -4.28843200 | 1.91990600  | 1.98099800  |
| C | -4.37688800 | 2.05266900  | -1.68229700 |
| C | -5.32109300 | -0.12807900 | 1.02655400  |
| C | -2.95204800 | 3.85580500  | -0.74508100 |
| C | -4.67088000 | 0.58840900  | 2.13201500  |
| C | -3.36974400 | 2.99474300  | -1.86128700 |
| C | -4.99091400 | -0.21186300 | -1.43205700 |
| C | -2.57004700 | 3.50318300  | 1.68363300  |
| C | -4.24474500 | 0.72371100  | -2.27614600 |
| C | -3.01432200 | 2.37830400  | 2.51586800  |
| C | -4.92037300 | -1.53313000 | 1.11402200  |
| C | -1.52431000 | 4.12730700  | -0.91488700 |
| C | -3.78979000 | -0.34378500 | 2.83058800  |
| C | -2.18913300 | 2.66804300  | -2.66005600 |
| C | -4.60642700 | -1.55346000 | -1.35006500 |
| C | -1.21296800 | 3.76898100  | 1.52158800  |
| C | -4.04368300 | -1.67892000 | 2.27393400  |
| C | -1.07929700 | 3.46057100  | -2.14049900 |
| C | -2.07715700 | 1.46348500  | 3.09107500  |
| C | -3.04269800 | 0.32558700  | -2.93703600 |
| C | -4.62638500 | -2.26001100 | -0.06036500 |
| C | -0.67545000 | 4.15229000  | 0.21167900  |
| C | -2.48560700 | 0.04450900  | 3.26535600  |
| C | -1.97099400 | 1.33794900  | -3.15324600 |
| C | -3.47975900 | -2.02986300 | -2.12433500 |
| C | -0.23092500 | 2.93043800  | 2.20163200  |
| C | -2.69245000 | -1.10983400 | -2.88513400 |
| C | -0.64383000 | 1.80039800  | 2.97700000  |
| C | -3.53883400 | -3.22587200 | -0.07691400 |
| C | 0.66320400  | 3.58238500  | 0.12224900  |
| C | -3.02977100 | -2.63784100 | 2.27028600  |
| C | 0.23523400  | 2.97721200  | -2.24032100 |
| C | -2.83983200 | -3.12367600 | -1.36131600 |
| C | 0.95543800  | 2.85900500  | 1.35761200  |
| C | -1.44614600 | -1.01101900 | 3.34862400  |
| C | -0.57276900 | 0.89953600  | -3.34825000 |
| C | -2.79691300 | -3.47728300 | 1.09335800  |
| C | 1.13263800  | 3.06515900  | -1.08941500 |

|    |             |             |             |
|----|-------------|-------------|-------------|
| C  | -1.74590200 | -2.34228200 | 2.88308600  |
| C  | 0.51353200  | 1.73446100  | -2.92592600 |
| C  | -1.33119400 | -1.48436300 | -3.11787200 |
| C  | 0.33095200  | 0.76140300  | 3.12674500  |
| C  | -0.29493800 | -0.51633700 | -3.36708600 |
| C  | -0.06710100 | -0.62497200 | 3.34166500  |
| C  | -1.45453900 | -3.39398200 | -1.46622800 |
| C  | 1.82792900  | 1.72815000  | 1.36652300  |
| C  | -1.37655500 | -3.76515900 | 1.02033500  |
| C  | 2.01244500  | 1.90074100  | -1.10427800 |
| C  | -0.73998700 | -3.12515400 | 2.18283400  |
| C  | 1.72569700  | 1.14675800  | -2.31537100 |
| C  | -0.73326100 | -2.65888600 | -2.49590500 |
| C  | 1.60314100  | 0.77689500  | 2.43723100  |
| C  | -0.69111000 | -3.79055200 | -0.24207800 |
| C  | 2.44263500  | 1.26943600  | 0.11153900  |
| C  | 0.98565700  | -1.09500000 | -2.96037800 |
| C  | 0.97085300  | -1.47433100 | 2.79562500  |
| C  | 0.63220200  | -2.72097700 | 2.14795200  |
| C  | 2.03913300  | -0.26006600 | -2.35302800 |
| C  | 0.69525100  | -2.45656700 | -2.46623800 |
| C  | 2.03884800  | -0.59885300 | 2.26371600  |
| C  | 0.74252900  | -3.58986100 | -0.22166900 |
| C  | 3.33745700  | -0.00323100 | 0.01960400  |
| C  | 1.41898200  | -3.12005200 | 0.99842900  |
| C  | 2.85523000  | -0.82630400 | -1.28940400 |
| C  | 1.46860600  | -2.98840700 | -1.37241300 |
| C  | 2.81882200  | -1.00598300 | 1.15585100  |
| C  | 2.57202700  | -2.20895100 | -0.87164400 |
| C  | 2.55123300  | -2.29732700 | 0.59119200  |
| Pr | 0.46379100  | -0.82182200 | -0.28912400 |
| C  | 6.55737500  | 2.09165700  | 0.54207300  |
| C  | 5.22152600  | 1.67665300  | 0.42388200  |
| C  | 4.85822400  | 0.34106100  | 0.11655500  |
| C  | 5.92630800  | -0.56094000 | -0.06799600 |
| C  | 7.27222700  | -0.18623100 | 0.03880300  |
| C  | 7.56292700  | 1.14437900  | 0.34476800  |
| H  | 4.42891600  | 2.40827900  | 0.57127600  |
| H  | 8.06297600  | -0.91619900 | -0.11381200 |
| Cl | 5.66831300  | -2.35284600 | -0.47484900 |
| Cl | 9.33128200  | 1.65420100  | 0.48768200  |
| H  | 6.80424500  | 3.12471500  | 0.77826200  |

## 22. 4a' (BLYP/3-21G~MWB48)

|   |             |             |             |
|---|-------------|-------------|-------------|
| C | -4.43694300 | 2.73503900  | 0.69567500  |
| C | -4.95523800 | 2.03012200  | -0.40342000 |
| C | -5.39080600 | 0.64036900  | -0.25195900 |
| C | -3.33550600 | 3.67874100  | 0.50946100  |
| C | -4.19957200 | 2.01122400  | 1.95415200  |
| C | -4.29142700 | 2.15269200  | -1.70806700 |
| C | -5.30869800 | 0.00284600  | 0.99944700  |
| C | -2.79883400 | 3.90234200  | -0.77107500 |
| C | -4.62983700 | 0.69389600  | 2.10429200  |
| C | -3.24969100 | 3.05741800  | -1.88700900 |
| C | -4.98728600 | -0.08912100 | -1.45993700 |
| C | -2.42433200 | 3.53173700  | 1.65470600  |
| C | -4.20863400 | 0.82046600  | -2.30366900 |
| C | -2.90798300 | 2.42193700  | 2.48626700  |
| C | -4.95944300 | -1.41597400 | 1.08328700  |
| C | -1.36270900 | 4.12358600  | -0.94321400 |
| C | -3.78148600 | -0.27074900 | 2.79876600  |
| C | -2.08371200 | 2.68920600  | -2.68795200 |
| C | -4.65269400 | -1.44431200 | -1.38148300 |
| C | -1.05886900 | 3.74891500  | 1.48921700  |
| C | -4.08520700 | -1.59589400 | 2.24046200  |
| C | -0.94396300 | 3.44030400  | -2.16920800 |
| C | -2.00380300 | 1.47280500  | 3.05618800  |
| C | -3.02359600 | 0.37965700  | -2.96692600 |
| C | -4.69570200 | -2.15190000 | -0.09268800 |
| C | -0.50990200 | 4.11695500  | 0.17971200  |
| C | -2.46348900 | 0.06868700  | 3.23012600  |
| C | -1.91575400 | 1.35266000  | -3.18230300 |
| C | -3.54613600 | -1.96080100 | -2.15901400 |
| C | -0.10561100 | 2.87375100  | 2.16323000  |
| C | -2.72681200 | -1.06847500 | -2.91871700 |
| C | -0.56019000 | 1.75737400  | 2.93443200  |
| C | -3.64455300 | -3.15741400 | -0.11376500 |
| C | 0.81133200  | 3.50516200  | 0.08721200  |
| C | -3.10752200 | -2.59139600 | 2.23194400  |
| C | 0.35132500  | 2.91012700  | -2.26952100 |
| C | -2.94474800 | -3.07855200 | -1.39885800 |
| C | 1.07928600  | 2.76726000  | 1.31885600  |
| C | -1.46332200 | -1.02515500 | 3.30851300  |
| C | -0.53575300 | 0.86365300  | -3.37876000 |
| C | -2.90903100 | -3.43828700 | 1.05405600  |
| C | 1.26226200  | 2.97257300  | -1.12563400 |

|    |             |             |             |
|----|-------------|-------------|-------------|
| C  | -1.81161300 | -2.34500300 | 2.84201000  |
| C  | 0.58087800  | 1.65724900  | -2.95350100 |
| C  | -1.38235600 | -1.49313800 | -3.15667000 |
| C  | 0.37338900  | 0.68199700  | 3.07284600  |
| C  | -0.31282400 | -0.56138100 | -3.40344000 |
| C  | -0.07285300 | -0.68982800 | 3.29515700  |
| C  | -1.56974900 | -3.39981500 | -1.50678300 |
| C  | 1.91598600  | 1.60882800  | 1.32112700  |
| C  | -1.50075800 | -3.77933600 | 0.97715600  |
| C  | 2.10811100  | 1.78165600  | -1.14437900 |
| C  | -0.83760400 | -3.16428000 | 2.13924500  |
| C  | 1.77447600  | 1.02981900  | -2.35123800 |
| C  | -0.82511800 | -2.68932100 | -2.53678600 |
| C  | 1.63565300  | 0.65138000  | 2.37370500  |
| C  | -0.81851300 | -3.82827100 | -0.28589700 |
| C  | 2.53205500  | 1.14368500  | 0.06948700  |
| C  | 0.94291600  | -1.18409500 | -2.99529900 |
| C  | 0.93093100  | -1.57579800 | 2.74396300  |
| C  | 0.54976700  | -2.81279400 | 2.10144900  |
| C  | 2.01895800  | -0.38748600 | -2.38611400 |
| C  | 0.60884900  | -2.53715500 | -2.50626000 |
| C  | 2.02173800  | -0.73818700 | 2.20227100  |
| C  | 0.62448900  | -3.68156600 | -0.26778100 |
| C  | 3.34471000  | -0.18882300 | -0.03201800 |
| C  | 1.32447600  | -3.24209600 | 0.95261900  |
| C  | 2.81176700  | -0.98672600 | -1.32639300 |
| C  | 1.36591800  | -3.10271600 | -1.41731200 |
| C  | 2.80281500  | -1.17331700 | 1.10854500  |
| C  | 2.50757800  | -2.37224300 | -0.91977800 |
| C  | 2.49385200  | -2.46356900 | 0.54445000  |
| Pr | 0.45122500  | -0.91755500 | -0.29228000 |
| C  | 6.94708700  | -0.07665500 | -1.44342600 |
| C  | 5.56191500  | -0.25360600 | -1.29633100 |
| C  | 4.88773800  | 0.01333400  | -0.07969300 |
| C  | 5.68372500  | 0.47193900  | 0.98639300  |
| C  | 7.06812300  | 0.65854300  | 0.88362200  |
| C  | 7.67554700  | 0.37826000  | -0.34232700 |
| H  | 7.44279900  | -0.28767800 | -2.38885000 |
| H  | 4.97404000  | -0.61323200 | -2.14165100 |
| H  | 7.64620000  | 1.00992500  | 1.73429900  |
| Cl | 4.95753500  | 0.86889100  | 2.64372200  |
| Cl | 9.49951200  | 0.62104900  | -0.50112700 |



23. 4b (BLYP/3-21G~MWB48)

|   |             |             |             |
|---|-------------|-------------|-------------|
| C | -4.33613600 | 2.80645800  | 0.72956400  |
| C | -4.85924000 | 2.12537900  | -0.38210700 |
| C | -5.32285100 | 0.74293500  | -0.25083000 |
| C | -3.21506600 | 3.73019700  | 0.56366700  |
| C | -4.12389700 | 2.06402300  | 1.98162700  |
| C | -4.18219100 | 2.25028400  | -1.68009600 |
| C | -5.26352400 | 0.08965500  | 0.99352200  |
| C | -2.66394400 | 3.95782600  | -0.70975200 |
| C | -4.58106600 | 0.75400900  | 2.11196500  |
| C | -3.12223400 | 3.13658800  | -1.83984100 |
| C | -4.92213800 | 0.02022300  | -1.46408700 |
| C | -2.31742000 | 3.55186300  | 1.71583800  |
| C | -4.11954900 | 0.92403400  | -2.29081600 |
| C | -2.82925700 | 2.44268900  | 2.53001000  |
| C | -4.94242300 | -1.33663800 | 1.06357900  |
| C | -1.22229400 | 4.15165400  | -0.86762700 |
| C | -3.75782000 | -0.23506500 | 2.80245900  |
| C | -1.95673200 | 2.75526500  | -2.63645800 |
| C | -4.61437000 | -1.34163800 | -1.39891000 |
| C | -0.94690500 | 3.74408200  | 1.56533700  |
| C | -4.08242800 | -1.54639600 | 2.22609900  |
| C | -0.80765700 | 3.47744400  | -2.09959300 |
| C | -1.94853500 | 1.46952600  | 3.09770900  |
| C | -2.93720300 | 0.46848100  | -2.94977200 |
| C | -4.68221300 | -2.06315500 | -0.11911300 |
| C | -0.38066700 | 4.11438700  | 0.26399200  |
| C | -2.43717000 | 0.07340500  | 3.25066500  |
| C | -1.80973400 | 1.42205100  | -3.14667300 |
| C | -3.51031600 | -1.86960000 | -2.17306300 |
| C | -0.01700900 | 2.84319600  | 2.23953000  |
| C | -2.66772300 | -0.98472100 | -2.91615200 |
| C | -0.49807000 | 1.72732900  | 2.99613700  |
| C | -3.64998900 | -3.08782400 | -0.14322300 |
| C | 0.92434100  | 3.47178700  | 0.17425200  |
| C | -3.12356000 | -2.56000200 | 2.21448300  |
| C | 0.47800300  | 2.92273100  | -2.19889400 |
| C | -2.93794000 | -3.00735500 | -1.42205800 |
| C | 1.16925200  | 2.71745000  | 1.40176700  |
| C | -1.45862000 | -1.03941900 | 3.32554100  |
| C | -0.43688300 | 0.90844700  | -3.34078400 |
| C | -2.93025900 | -3.39513100 | 1.02743500  |
| C | 1.37090000  | 2.94465900  | -1.04132800 |

|    |             |             |             |
|----|-------------|-------------|-------------|
| C  | -1.82936700 | -2.34530800 | 2.83906600  |
| C  | 0.69143500  | 1.67618600  | -2.90066500 |
| C  | -1.32906200 | -1.43260500 | -3.14915100 |
| C  | 0.41584200  | 0.63394800  | 3.13679600  |
| C  | -0.23857600 | -0.52017700 | -3.37836800 |
| C  | -0.05996000 | -0.73072800 | 3.33177600  |
| C  | -1.56880200 | -3.35279400 | -1.52286100 |
| C  | 1.97977700  | 1.54097200  | 1.40116100  |
| C  | -1.52813400 | -3.76064000 | 0.95806400  |
| C  | 2.18206100  | 1.73208900  | -1.06662600 |
| C  | -0.86462300 | -3.17286400 | 2.13305300  |
| C  | 1.86395200  | 1.01325000  | -2.29004200 |
| C  | -0.80170300 | -2.64675600 | -2.53947100 |
| C  | 1.69155600  | 0.58770900  | 2.45498000  |
| C  | -0.83712500 | -3.80854000 | -0.30080400 |
| C  | 2.57408200  | 1.06444300  | 0.14267900  |
| C  | 1.00403800  | -1.17424900 | -2.96928700 |
| C  | 0.93206100  | -1.62956500 | 2.77865600  |
| C  | 0.52799600  | -2.84626800 | 2.11149100  |
| C  | 2.09700700  | -0.40825500 | -2.34388200 |
| C  | 0.63516500  | -2.52367900 | -2.49658800 |
| C  | 2.05083300  | -0.80742200 | 2.26477900  |
| C  | 0.60538000  | -3.68877100 | -0.26957600 |
| C  | 3.39569700  | -0.25503900 | 0.03693900  |
| C  | 1.29951600  | -3.27424500 | 0.96153100  |
| C  | 2.87673600  | -1.03410400 | -1.28612200 |
| C  | 1.37020000  | -3.11253800 | -1.40699900 |
| C  | 2.81622300  | -1.24308600 | 1.15723800  |
| C  | 2.51461800  | -2.40463200 | -0.88936800 |
| C  | 2.47643100  | -2.50867900 | 0.57184700  |
| Pr | 0.48844800  | -0.91371000 | -0.27879200 |
| C  | 6.73461500  | 1.64873400  | 0.29403600  |
| C  | 5.37557400  | 1.34408700  | 0.23667700  |
| C  | 4.93689700  | 0.00186500  | 0.11132600  |
| C  | 5.94885400  | -0.97942300 | 0.05139600  |
| C  | 7.31360300  | -0.66929700 | 0.11296900  |
| C  | 7.72577100  | 0.66798300  | 0.23580500  |
| H  | 4.64113300  | 2.14392600  | 0.28659200  |
| H  | 8.04822700  | -1.47101700 | 0.06280900  |
| Cl | 5.58022600  | -2.78799000 | -0.12682700 |
| Cl | 7.23595900  | 3.42153100  | 0.45142300  |
| H  | 8.78085800  | 0.92947700  | 0.28247300  |

24. **4b'** (BLYP/3-21G~MWB48)

|   |             |             |             |
|---|-------------|-------------|-------------|
| C | -4.50470000 | 2.62244900  | 0.49329100  |
| C | -4.91971600 | 1.92934900  | -0.65576400 |
| C | -5.32667800 | 0.52562900  | -0.56590700 |
| C | -3.41957500 | 3.59930600  | 0.41004800  |
| C | -4.34256400 | 1.87731200  | 1.75090100  |
| C | -4.16426500 | 2.09849000  | -1.90408700 |
| C | -5.32008800 | -0.13749300 | 0.67424600  |
| C | -2.79488000 | 3.86483700  | -0.82149700 |
| C | -4.74520700 | 0.54585500  | 1.84067900  |
| C | -3.13741500 | 3.03377700  | -1.98514100 |
| C | -4.81429100 | -0.16542700 | -1.75506500 |
| C | -2.59266900 | 3.45001500  | 1.61722400  |
| C | -4.00118700 | 0.78285400  | -2.51970000 |
| C | -3.10673200 | 2.30979900  | 2.38746800  |
| C | -4.93919000 | -1.54816700 | 0.75479700  |
| C | -1.35655600 | 4.12811700  | -0.88068300 |
| C | -3.92536900 | -0.41144700 | 2.57751500  |
| C | -1.90539700 | 2.71414800  | -2.70306800 |
| C | -4.44937600 | -1.51276700 | -1.67969200 |
| C | -1.22523100 | 3.70647700  | 1.55964600  |
| C | -4.14886000 | -1.73066900 | 1.97025600  |
| C | -0.82873200 | 3.48317000  | -2.08499700 |
| C | -2.22148300 | 1.37222400  | 3.00465000  |
| C | -2.75820500 | 0.38785500  | -3.10130600 |
| C | -4.56871800 | -2.25025900 | -0.41271600 |
| C | -0.59030500 | 4.11818100  | 0.30308900  |
| C | -2.65332500 | -0.04710400 | 3.11457300  |
| C | -1.66447700 | 1.39401300  | -3.21058100 |
| C | -3.27438800 | -1.98276500 | -2.38194300 |
| C | -0.30042100 | 2.84293600  | 2.28639900  |
| C | -2.42610700 | -1.05330900 | -3.06187700 |
| C | -0.78077800 | 1.69777900  | 2.99841500  |
| C | -3.49155300 | -3.22732200 | -0.37511600 |
| C | 0.75148000  | 3.54487500  | 0.29819200  |
| C | -3.14663600 | -2.70008700 | 2.01524600  |
| C | 0.48470600  | 2.98993800  | -2.09893600 |
| C | -2.70008400 | -3.10034800 | -1.60171400 |
| C | 0.94767500  | 2.78744600  | 1.53244500  |
| C | -1.63180300 | -1.11579900 | 3.24488200  |
| C | -0.26098400 | 0.94576100  | -3.31151000 |
| C | -2.83796000 | -3.51507800 | 0.83877700  |
| C | 1.30446300  | 3.04928000  | -0.88786400 |

|    |             |             |             |
|----|-------------|-------------|-------------|
| C  | -1.90741600 | -2.43347300 | 2.72590400  |
| C  | 0.79898700  | 1.75865100  | -2.78947500 |
| C  | -1.05572400 | -1.43656000 | -3.20404100 |
| C  | 0.16882300  | 0.64354800  | 3.18216100  |
| C  | 0.00275600  | -0.47159100 | -3.34830600 |
| C  | -0.25425000 | -0.74384900 | 3.34268200  |
| C  | -1.31288100 | -3.38423500 | -1.61362200 |
| C  | 1.81494400  | 1.65209600  | 1.57468000  |
| C  | -1.41902600 | -3.81794200 | 0.86110700  |
| C  | 2.18121900  | 1.88160200  | -0.86733300 |
| C  | -0.86163400 | -3.21160600 | 2.08203200  |
| C  | 1.96000600  | 1.14884500  | -2.11123800 |
| C  | -0.51315500 | -2.63167900 | -2.56963200 |
| C  | 1.48135300  | 0.66220500  | 2.58179700  |
| C  | -0.64339400 | -3.81822800 | -0.34800800 |
| C  | 2.53128000  | 1.22873800  | 0.36132600  |
| C  | 1.24139600  | -1.07088000 | -2.86127100 |
| C  | 0.81179600  | -1.59021800 | 2.84907200  |
| C  | 0.51414900  | -2.82272700 | 2.15569400  |
| C  | 2.24586700  | -0.26024200 | -2.15586000 |
| C  | 0.91026900  | -2.44322700 | -2.42864100 |
| C  | 1.91544500  | -0.71278900 | 2.40770400  |
| C  | 0.78938900  | -3.63615800 | -0.21862200 |
| C  | 3.38614300  | -0.07933100 | 0.29374000  |
| C  | 1.38410200  | -3.20645900 | 1.06043600  |
| C  | 2.97475200  | -0.86110900 | -1.05187000 |
| C  | 1.59812300  | -3.01135100 | -1.29637100 |
| C  | 2.79095000  | -1.10366400 | 1.36947600  |
| C  | 2.67890200  | -2.26372500 | -0.69924100 |
| C  | 2.55890900  | -2.38893700 | 0.75735900  |
| Pr | 0.54158000  | -0.88036900 | -0.19225600 |
| C  | 7.03427400  | 0.33111100  | -0.84355400 |
| C  | 5.66518500  | 0.06823900  | -0.83394700 |
| C  | 4.92001900  | 0.18758300  | 0.36419000  |
| C  | 5.63134000  | 0.58327100  | 1.51255100  |
| C  | 7.00817500  | 0.84002900  | 1.50204200  |
| C  | 7.73201400  | 0.71505000  | 0.30412500  |
| H  | 5.15730500  | -0.23423400 | -1.74830800 |
| H  | 7.50819900  | 1.13619000  | 2.42253500  |
| Cl | 4.79178700  | 0.80640600  | 3.14721300  |
| Cl | 7.95684400  | 0.16409600  | -2.43697900 |
| H  | 8.80155500  | 0.91235800  | 0.27116000  |

25. 4c (BLYP/3-21G~MWB48)

|   |             |             |             |
|---|-------------|-------------|-------------|
| C | -4.58198100 | 2.69564900  | 0.60213400  |
| C | -5.02520100 | 2.01668900  | -0.54528900 |
| C | -5.45460000 | 0.61945800  | -0.45796000 |
| C | -3.48171700 | 3.65365800  | 0.50911900  |
| C | -4.41422400 | 1.93971500  | 1.85279900  |
| C | -4.28504300 | 2.18063800  | -1.80322200 |
| C | -5.44112500 | -0.05093700 | 0.77846900  |
| C | -2.87001400 | 3.91538200  | -0.72988400 |
| C | -4.83868500 | 0.61533900  | 1.94050000  |
| C | -3.24311900 | 3.09766200  | -1.89332000 |
| C | -4.97098800 | -0.07286700 | -1.65804200 |
| C | -2.64048700 | 3.48290100  | 1.70411600  |
| C | -4.15303800 | 0.86523200  | -2.42850300 |
| C | -3.16196500 | 2.34713300  | 2.47441600  |
| C | -5.08305900 | -1.46846400 | 0.84573300  |
| C | -1.42818100 | 4.15280500  | -0.80795700 |
| C | -4.02406100 | -0.36062100 | 2.66008400  |
| C | -2.02697200 | 2.76237800  | -2.63267500 |
| C | -4.62792900 | -1.42755700 | -1.59551400 |
| C | -1.26988600 | 3.71671400  | 1.62913600  |
| C | -4.27888600 | -1.67142200 | 2.04909500  |
| C | -0.92953600 | 3.50665600  | -2.02500300 |
| C | -2.28331100 | 1.39060800  | 3.07261300  |
| C | -2.92509100 | 0.45266700  | -3.03013400 |
| C | -4.74107300 | -2.16970400 | -0.33086700 |
| C | -0.64636800 | 4.12191000  | 0.36482400  |
| C | -2.73814100 | -0.02147900 | 3.18046800  |
| C | -1.81566000 | 1.44036400  | -3.15167300 |
| C | -3.47160600 | -1.91256000 | -2.31658100 |
| C | -0.34971400 | 2.83371300  | 2.33863600  |
| C | -2.61688100 | -0.99330600 | -3.00071000 |
| C | -0.83753300 | 1.69182200  | 3.05004100  |
| C | -3.68055400 | -3.16591600 | -0.31377600 |
| C | 0.68430500  | 3.52387000  | 0.33773800  |
| C | -3.29293500 | -2.65826500 | 2.07500500  |
| C | 0.37592200  | 2.99104000  | -2.06114200 |
| C | -2.90485700 | -3.04655300 | -1.55087900 |
| C | 0.88668800  | 2.76100000  | 1.56641200  |
| C | -1.73330200 | -1.10767100 | 3.29146300  |
| C | -0.42212100 | 0.96924800  | -3.27769700 |
| C | -3.01452500 | -3.47040200 | 0.88907900  |
| C | 1.20947600  | 3.02657700  | -0.86075100 |

|    |             |             |             |
|----|-------------|-------------|-------------|
| C  | -2.03946500 | -2.41646900 | 2.76881200  |
| C  | 0.65904700  | 1.75849100  | -2.76431900 |
| C  | -1.25372500 | -1.39903100 | -3.16257800 |
| C  | 0.09901100  | 0.62106100  | 3.22064900  |
| C  | -0.18038800 | -0.45457700 | -3.32320900 |
| C  | -0.34706700 | -0.76080900 | 3.37554700  |
| C  | -1.52452700 | -3.35490600 | -1.58402000 |
| C  | 1.73087200  | 1.60764000  | 1.59027500  |
| C  | -1.60065500 | -3.79650900 | 0.88920200  |
| C  | 2.06091100  | 1.84068300  | -0.85774100 |
| C  | -1.01572300 | -3.20781900 | 2.10582400  |
| C  | 1.81844100  | 1.12068800  | -2.10749400 |
| C  | -0.72246300 | -2.60830700 | -2.54593800 |
| C  | 1.40536300  | 0.62165200  | 2.60624900  |
| C  | -0.84399600 | -3.80907900 | -0.33124600 |
| C  | 2.40547000  | 1.17413800  | 0.35912000  |
| C  | 1.06161000  | -1.08289300 | -2.87253200 |
| C  | 0.69661100  | -1.62435200 | 2.86673000  |
| C  | 0.36597100  | -2.84269700 | 2.16196400  |
| C  | 2.09349400  | -0.29048000 | -2.17487900 |
| C  | 0.70963400  | -2.45399100 | -2.43717100 |
| C  | 1.81027400  | -0.76366500 | 2.41745700  |
| C  | 0.59311900  | -3.65018000 | -0.22314100 |
| C  | 3.23113900  | -0.14670300 | 0.27507700  |
| C  | 1.20870800  | -3.23495300 | 1.04909700  |
| C  | 2.82432000  | -0.91268800 | -1.08022700 |
| C  | 1.40424200  | -3.04376000 | -1.31386200 |
| C  | 2.63254300  | -1.16049000 | 1.34390200  |
| C  | 2.49725100  | -2.30806800 | -0.72457400 |
| C  | 2.38661700  | -2.43611000 | 0.73247300  |
| Pr | 0.36236000  | -0.89551900 | -0.27430000 |
| C  | 6.63299500  | 0.75638000  | 1.85529700  |
| C  | 5.25961600  | 0.51498400  | 1.69771800  |
| C  | 4.74665000  | 0.09619800  | 0.44943400  |
| C  | 5.62448500  | -0.07467100 | -0.63677300 |
| C  | 6.99326300  | 0.16979000  | -0.47153800 |
| C  | 7.49691800  | 0.58179700  | 0.76432900  |
| H  | 4.58951700  | 0.65209400  | 2.54716900  |
| H  | 5.24437600  | -0.39944900 | -1.60487300 |
| Cl | 9.28610300  | 0.90687500  | 1.00722900  |
| Cl | 8.09691300  | -0.06648700 | -1.92023600 |
| H  | 7.04003900  | 1.07595700  | 2.81321800  |

26. 4c' (BLYP/3-21G~MWB48)

|   |             |             |             |
|---|-------------|-------------|-------------|
| C | -4.36976000 | 2.87941800  | 0.80537100  |
| C | -4.97848400 | 2.14115900  | -0.22332600 |
| C | -5.44022600 | 0.77363000  | 0.02261000  |
| C | -3.25825300 | 3.77931300  | 0.50397500  |
| C | -4.07134000 | 2.20789700  | 2.07999200  |
| C | -4.39814500 | 2.18286800  | -1.57195700 |
| C | -5.29394500 | 0.19277300  | 1.29577100  |
| C | -2.80042900 | 3.92703200  | -0.81757700 |
| C | -4.52697900 | 0.91306300  | 2.32033100  |
| C | -3.34622800 | 3.04591300  | -1.86077100 |
| C | -5.13749500 | -0.02284500 | -1.17217000 |
| C | -2.27897600 | 3.65830800  | 1.59448300  |
| C | -4.39062800 | 0.82164500  | -2.10606600 |
| C | -2.73688800 | 2.60410900  | 2.50829900  |
| C | -4.97821900 | -1.23051700 | 1.42579200  |
| C | -1.37291700 | 4.09566500  | -1.09138400 |
| C | -3.66102100 | -0.04369400 | 3.00587100  |
| C | -2.24478900 | 2.60569400  | -2.71615500 |
| C | -4.83515200 | -1.38329200 | -1.04939100 |
| C | -0.92192900 | 3.82729200  | 1.33325600  |
| C | -4.03658300 | -1.38298600 | 2.53353500  |
| C | -1.05457700 | 3.34362100  | -2.30821500 |
| C | -1.82265000 | 1.65529700  | 3.06277100  |
| C | -3.26373700 | 0.31464600  | -2.82148600 |
| C | -4.81123200 | -2.02721900 | 0.27237800  |
| C | -0.45007600 | 4.11502300  | -0.02574000 |
| C | -2.30815900 | 0.27615500  | 3.33435800  |
| C | -2.14563900 | 1.24174700  | -3.15316200 |
| C | -3.79625000 | -1.96796200 | -1.86908400 |
| C | 0.04987900  | 2.95720700  | 1.98760800  |
| C | -3.00472000 | -1.13779100 | -2.72147400 |
| C | -0.38195900 | 1.89108700  | 2.83853900  |
| C | -3.79138500 | -3.06391400 | 0.23348600  |
| C | 0.84550900  | 3.45902200  | -0.17216400 |
| C | -3.08910200 | -2.40746900 | 2.51125800  |
| C | 0.21738200  | 2.77048100  | -2.46627200 |
| C | -3.17606100 | -3.06859600 | -1.09564900 |
| C | 1.17564300  | 2.77725100  | 1.07618200  |
| C | -1.33504700 | -0.84186400 | 3.40219600  |
| C | -0.79675000 | 0.70254100  | -3.41518500 |
| C | -2.99066100 | -3.31310200 | 1.36466800  |
| C | 1.19813300  | 2.85594300  | -1.38549700 |

|    |             |             |             |
|----|-------------|-------------|-------------|
| C  | -1.74960900 | -2.17019700 | 3.02256900  |
| C  | 0.36647800  | 1.47902300  | -3.10221800 |
| C  | -1.68796800 | -1.61329600 | -3.01992800 |
| C  | 0.53210000  | 0.79628600  | 2.97369400  |
| C  | -0.61230400 | -0.73008000 | -3.38262600 |
| C  | 0.06124600  | -0.55052900 | 3.28539000  |
| C  | -1.82231500 | -3.43846200 | -1.27601800 |
| C  | 1.97551200  | 1.59258600  | 1.08212400  |
| C  | -1.59997800 | -3.69985800 | 1.21434200  |
| C  | 2.00307300  | 1.63753300  | -1.39887100 |
| C  | -0.84619000 | -3.05113600 | 2.30086600  |
| C  | 1.58007500  | 0.84155500  | -2.55221600 |
| C  | -1.12424900 | -2.79892300 | -2.38525000 |
| C  | 1.74839700  | 0.69655600  | 2.20258500  |
| C  | -1.00411000 | -3.83164900 | -0.08598900 |
| C  | 2.47265900  | 1.04323800  | -0.18628400 |
| C  | 0.65401700  | -1.37752800 | -3.04161700 |
| C  | 1.00099900  | -1.49244800 | 2.71711800  |
| C  | 0.54309500  | -2.74310400 | 2.15618500  |
| C  | 1.79070800  | -0.58228000 | -2.54066000 |
| C  | 0.31474900  | -2.69938100 | -2.46648100 |
| C  | 2.07699400  | -0.71509400 | 2.06924700  |
| C  | 0.44055100  | -3.72991600 | -0.16982500 |
| C  | 3.23525500  | -0.31402500 | -0.27015200 |
| C  | 1.22554400  | -3.25110500 | 0.98096800  |
| C  | 2.63425300  | -1.15695800 | -1.50322600 |
| C  | 1.12677400  | -3.23837900 | -1.39643100 |
| C  | 2.74392100  | -1.22240900 | 0.93754000  |
| C  | 2.30929600  | -2.50816000 | -1.00502200 |
| C  | 2.38043800  | -2.52711100 | 0.46084400  |
| Pr | 0.29494500  | -0.98712900 | -0.39474400 |
| C  | 6.88255500  | -0.13091300 | -1.53363900 |
| C  | 5.49258500  | -0.33731300 | -1.49992500 |
| C  | 4.76788800  | -0.12394500 | -0.31084900 |
| C  | 5.44942000  | 0.30106000  | 0.84977100  |
| C  | 6.83245100  | 0.50246900  | 0.80818300  |
| C  | 7.54748100  | 0.28886000  | -0.37507300 |
| H  | 4.96859100  | -0.66740700 | -2.39731800 |
| Cl | 7.67745100  | 1.04785400  | 2.34512400  |
| Cl | 9.36215800  | 0.54679000  | -0.45228900 |
| H  | 4.91352800  | 0.47492100  | 1.78229300  |
| H  | 7.45107700  | -0.29294300 | -2.44807300 |
